# Supplementary material for: Metal-free direct difunctionalization of alkenes with I2O5 and P(O)–H compounds leading to β-iodophosphates
Source: Royal Society of Chemistry journal article supplement (doi:10.1039/c5qo00208g), 2015-01-01

## Supplementary Information

### **Metal-free direct difunctionalization of alkenes with I<sub>2</sub>O<sub>5</sub> and P(O)–H compounds leading to β-iodophosphates**

Chunli Li,<sup>‡</sup> Minghui Zhu,<sup>‡</sup> Wei Wei,<sup>\*</sup> Daoshan Yang, Hong Cui, Xiaoxia Liu, Hua Wang<sup>\*a</sup>

*The Key Laboratory of Life-Organic Analysis and Key Laboratory of Pharmaceutical Intermediates and Analysis of Natural Medicine, School of Chemistry and Chemical Engineering, Qufu Normal University, Qufu 273165, Shandong, China*

<sup>‡</sup> *Authors with equal contribution.*

*\*Phone: +86 537 4458317; Fax: +86 537 4458317.*

*E-mail: weiweiqfnu@163.com ; huawang\_qfnu@126.com*

### **Contents**

|                                                                                                                                 |         |
|---------------------------------------------------------------------------------------------------------------------------------|---------|
| 1. General information .....                                                                                                    | S2      |
| 2. General procedure for metal-free difunctionalization of alkenes with I <sub>2</sub> O <sub>5</sub> and P(O)–H compounds..... | S3      |
| 3. Preliminary mechanistic studies .....                                                                                        | S3      |
| 4. Characterization data of products <b>3aa–3ad</b> .....                                                                       | S8-S15  |
| 5. Copies of NMR spectra for <b>3aa–3ad</b> .....                                                                               | S16-S36 |

## 1. General information

All commercially available reagent grade chemicals were purchased from Aldrich, Acros, Alfa Aesar and Beijing Ouhe Chemical Company and used as received without further purification unless otherwise stated.  $^1\text{H}$  NMR,  $^{13}\text{C}$  NMR and  $^{31}\text{P}$  NMR were recorded in  $\text{CDCl}_3$  on a Bruker Avance III 400 spectrometer with TMS as internal standard (400 MHz  $^1\text{H}$ , 100 MHz  $^{13}\text{C}$ , 162 MHz  $^{31}\text{P}$ ) at room temperature, the chemical shifts ( $\delta$ ) were expressed in ppm and J values were given in Hz. The following abbreviations are used to indicate the multiplicity: singlet (s), doublet (d), triplet (t), quartet (q), doublet of doublets (dd), doublet of triplets (dt), and multiplet (m). All first order splitting patterns were assigned on the basis of the appearance of the multiplet. Splitting patterns that could not be easily interpreted were designated as multiplet (m). Mass analyses and HRMS were obtained on a Finnigan-LCQDECA mass spectrometer and a Bruker Daltonics Bio-TOF-Q mass spectrometer by the ESI method, respectively. Column chromatography was performed on silica gel (200-300 mesh).

## 2. General procedure for metal-free difunctionalization of alkenes with I<sub>2</sub>O<sub>5</sub> and P(O)-H compounds.

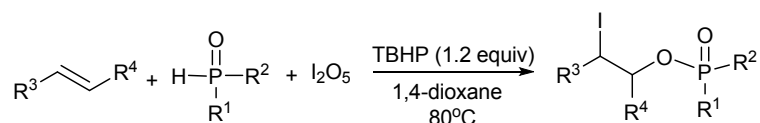

To a mixture of alkene **1** (0.25 mmol), P(O)-H compound **2** (0.5 mmol, **2c** and **2d** (0.75 mmol)), I<sub>2</sub>O<sub>5</sub> (0.25 mmol) and TBHP (0.3 mmol) in a 25 mL round-bottomed flask at room temperature, was added the 1,4-dioxane (2 mL). The reaction vessel was allowed to stir at 80 °C for 16-24 h. After the reaction, the solution was concentrated in vacuum. The resulting mixture purified by flash column chromatography using a mixture of petroleum ether and ethyl acetate as eluent to give the desired product **3**.

## 3. Preliminary mechanistic studies.

(1) The reaction of diethyl phosphonate **2d** with I<sub>2</sub>O<sub>5</sub> under standard conditions.

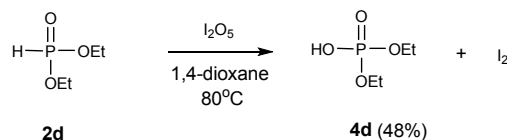

To a mixture of diethyl phosphonate **2d** (0.25 mmol) and I<sub>2</sub>O<sub>5</sub> (0.25 mmol) in a 25 mL round-bottomed flask at room temperature, was added the 1,4-dioxane (2 mL). The reaction vessel was allowed to stir at 80 °C for 10 h. After the reaction, the solution was concentrated in vacuum, the desired product **4d** was obtained in 48% yield.

(2) The reaction of styrene **1a**, diethyl phosphonate **2d**, and I<sub>2</sub> in the presence of TBHP.

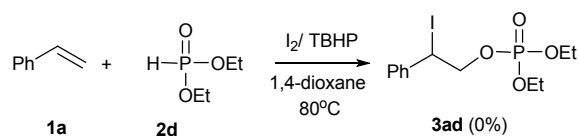

To a mixture of styrene **1a** (0.25 mmol), diethyl phosphonate **2d** (0.75 mmol), I<sub>2</sub> (0.25 mmol), and TBHP (0.3 mmol) in a 25 mL round-bottomed flask at room

temperature, was added the 1,4-dioxane (2 mL). The reaction vessel was allowed to stir at 80 °C for 16 h. After the reaction, the solution was concentrated in vacuum, none of the desired product **3ad** was detected.

(3) The reaction of styrene **1a**, diethyl hydrogen phosphate **4d**, and I<sub>2</sub> in the presence of TBHP.

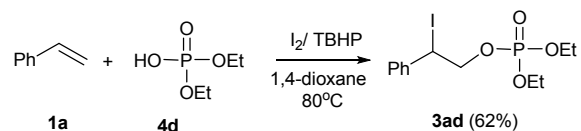

To a mixture of styrene **1a** (0.25 mmol), diethyl hydrogen phosphate **4d** (0.75 mmol), I<sub>2</sub> (0.25 mmol), and TBHP (0.3 mmol) in a 25 mL round-bottomed flask at room temperature, was added the 1,4-dioxane (2 mL). The reaction vessel was allowed to stir at 80 °C for 16 h. After the reaction, the solution was concentrated in vacuum, the desired product **3ad** was isolated in 62% yield.

(4) The reaction of styrene **1a** and **2a** with TEMPO under the standard conditions.

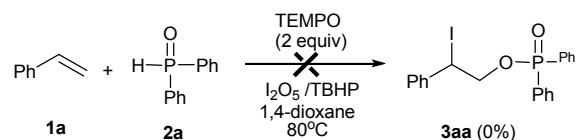

To a mixture of styrene **1a** (0.25 mmol), diphenylphosphine oxide **2a** (0.5 mmol), I<sub>2</sub>O<sub>5</sub> (0.25 mmol), TBHP (0.3 mmol) and TEMPO (0.5 mmol) in a 25 mL round-bottomed flask at room temperature, was added the 1,4-dioxane (2 mL). The reaction vessel was allowed to stir at 80 °C for 16 h. After the reaction, the solution was concentrated in vacuum, the TEMPO-trapped complex (Ph<sub>2</sub>P(O)-O-Tempo) was detected by LC-MS analysis and none of the desired product **3aa** was detected.

## The copy of LC/MS for TEMPO trapping experiment:

Data File Z:\LC-MS DATA\20150721\20150721 2015-07-22 15-12-04\045-0801.D  
Sample Name: Z-7-19-2

```
=====
Acq. Operator   : ZXE                               Seq. Line :    8
Acq. Instrument : Instrument 1                       Location  : Vial 45
Injection Date  : 7/22/2015 4:23:39 PM              Inj       :    1
                                                    Inj Volume: 2.000 µl
Acq. Method     : Z:\LC-MS DATA\20150721\20150721 2015-07-22 15-12-04\SH-METHOD.M
Last changed    : 7/22/2015 3:53:54 PM by ZXE
                  (modified after loading)
Analysis Method : Z:\LC-MS DATA\20150724\20150724 2015-07-24 09-25-24\SH-METHOD.M
Last changed    : 7/23/2015 3:05:15 PM by ZXE
=====
```

Sample-related custom fields:

| Name | Value |
|------|-------|
|------|-------|

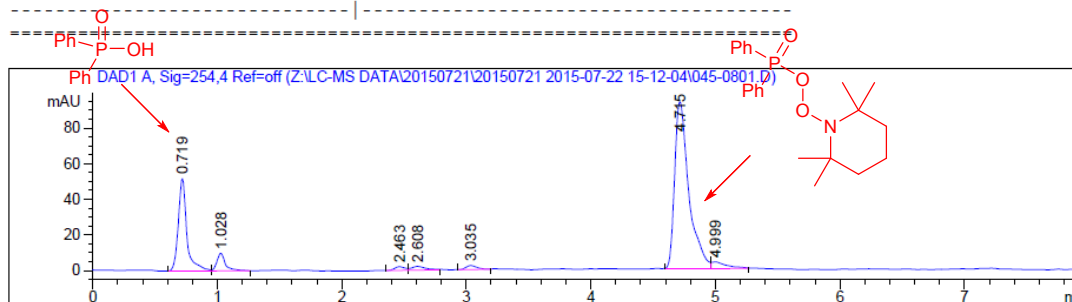

MS Spectrum

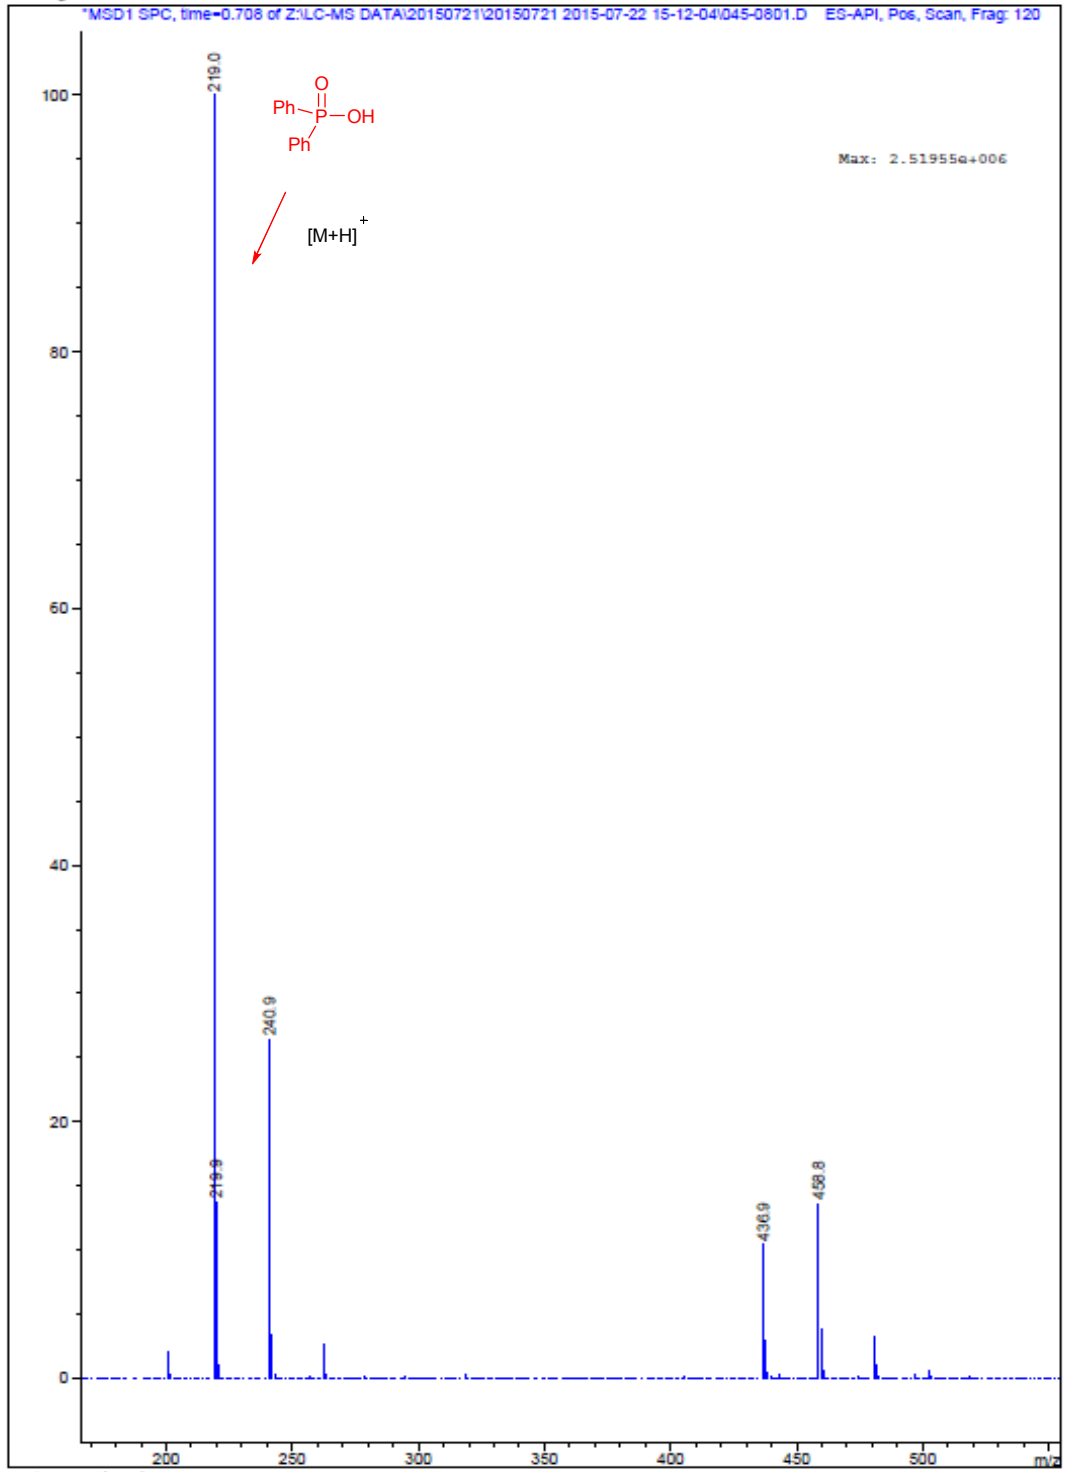

MS Spectrum

MSD1 SPC, time=4.845 of 2:\LC-MS DATA\20150721\20150721 2015-07-22 15-12-04\045-0801.D ES-API, Pos, Scan, Frag: 120

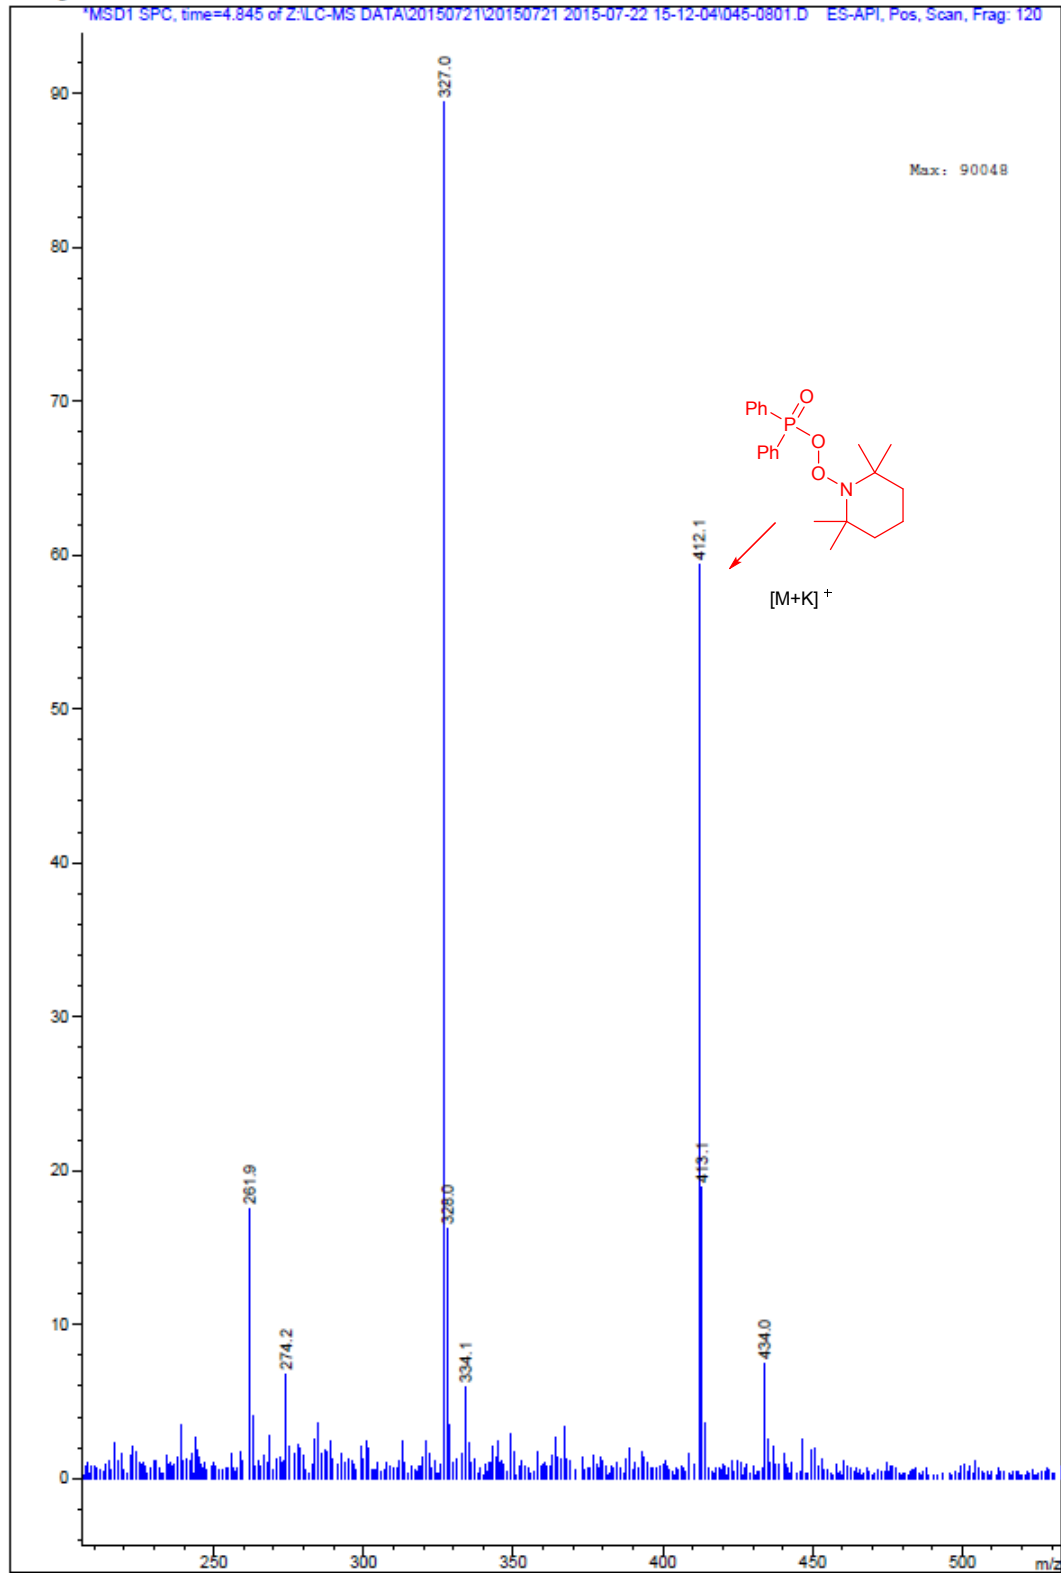

#### 4. Characterization data of products (3aa-3ad)

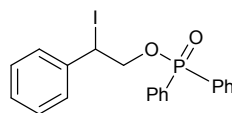

##### 2-iodo-2-phenylethyl diphenylphosphinate

Compound **3aa** was obtained in 80% yield according to the general procedure (16h). <sup>1</sup>H NMR (CDCl<sub>3</sub>, 400 MHz, ppm): δ 7.91-7.86 (m, 2H), 7.70-7.65 (m, 2H), 7.58-7.54 (m, 1H), 7.51-7.44 (m, 3H), 7.36-7.27 (m, 7H), 5.46-5.41 (m, 1H), 3.70 (dd, *J*<sub>1</sub> = 10.3 Hz, *J*<sub>2</sub> = 5.4 Hz, 1H), 3.61 (dd, *J*<sub>1</sub> = 10.3 Hz, *J*<sub>2</sub> = 6.7 Hz, 1H); <sup>13</sup>C NMR (CDCl<sub>3</sub>, 100 MHz, ppm): δ 138.5 (d, *J* = 3.9 Hz), 132.3 (d, *J* = 2.8 Hz), 132.2 (d, *J* = 2.8 Hz), 131.9 (d, *J* = 10.3 Hz), 131.6 (d, *J* = 10.4 Hz), 131.5 (d, *J* = 138.4 Hz), 130.9 (d, *J* = 134.8 Hz), 128.7, 128.5 (d, *J* = 13.4 Hz), 128.4, 128.3 (d, *J* = 13.2 Hz), 126.7, 76.4 (d, *J* = 5.5 Hz), 10.7 (d, *J* = 4.5 Hz); <sup>31</sup>P NMR (162 MHz, CDCl<sub>3</sub>): δ 32.4; HRMS calc. for C<sub>20</sub>H<sub>19</sub>O<sub>2</sub>PI (M+H)<sup>+</sup>, 449.0167; found, 449.0160.

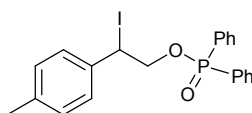

##### 2-iodo-2-p-tolylyethyl diphenylphosphinate

Compound **3ba** was obtained in 67% yield according to the general procedure (20h). <sup>1</sup>H NMR (CDCl<sub>3</sub>, 400 MHz, ppm): δ 7.90-7.85 (m, 2H), 7.70-7.66 (m, 2H), 7.55 (t, *J* = 7.2 Hz, 1H), 7.50-7.45 (m, 3H), 7.37-7.32 (m, 2H), 7.17 (d, *J* = 8.0 Hz, 2H), 7.12 (d, *J* = 8.0 Hz, 2H), 5.41-5.36 (m, 1H), 3.70 (dd, *J*<sub>1</sub> = 10.2 Hz, *J*<sub>2</sub> = 5.4 Hz, 1H), 3.60 (dd, *J*<sub>1</sub> = 10.2 Hz, *J*<sub>2</sub> = 6.9 Hz, 1H), 2.35 (s, 3H); <sup>13</sup>C NMR (CDCl<sub>3</sub>, 100 MHz, ppm): δ 138.6, 135.5 (d, *J* = 4.0 Hz), 132.3 (d, *J* = 2.8 Hz), 132.2 (d, *J* = 2.8 Hz), 132.0 (d, *J* = 10.4 Hz), 131.6 (d, *J* = 10.3 Hz), 131.6 (d, *J* = 136.3 Hz), 131.0 (d, *J* = 133.8 Hz), 129.1, 128.5 (d, *J* = 13.3 Hz), 128.3 (d, *J* = 13.2 Hz), 126.6, 76.5 (d, *J* = 5.5 Hz), 21.3, 10.9 (d, *J* = 4.5 Hz); <sup>31</sup>P NMR (162 MHz, CDCl<sub>3</sub>): δ 32.2; HRMS calc. for C<sub>21</sub>H<sub>21</sub>O<sub>2</sub>PI (M+H)<sup>+</sup>, 463.0324; found, 463.0327.

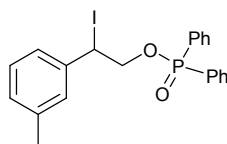

##### 2-iodo-2-m-tolylyethyl diphenylphosphinate

Compound **3ca** was obtained in 63% yield according to the general procedure (20h). <sup>1</sup>H NMR (CDCl<sub>3</sub>, 400 MHz, ppm): δ 7.91-7.86 (m, 2H), 7.69-7.64 (m, 2H), 7.56 (q, *J*<sub>1</sub> = 7.4 Hz, *J*<sub>2</sub> = 1.3 Hz, 1H), 7.51-7.45 (m, 3H), 7.36-7.32 (m, 2H), 7.20 (t, *J* = 7.6 Hz, 1H), 7.10 (t, *J* = 4.8 Hz, 2H), 7.02 (s, 1H), 5.43-5.37 (m, 1H), 3.70 (dd, *J*<sub>1</sub> = 10.3 Hz, *J*<sub>2</sub> = 5.6 Hz, 1H), 3.60 (dd, *J*<sub>1</sub> = 10.3 Hz, *J*<sub>2</sub> = 6.7 Hz, 1H), 2.30 (s, 3H); <sup>13</sup>C NMR



(CDCl<sub>3</sub>, 100 MHz, ppm):  $\delta$  138.3 (d,  $J$  = 3.7 Hz), 138.0, 132.3 (d,  $J$  = 2.7 Hz), 132.2 (d,  $J$  = 2.8 Hz), 132.0 (d,  $J$  = 10.4 Hz), 131.6 (d,  $J$  = 10.4 Hz), 131.6 (d,  $J$  = 136.3 Hz), 131.0 (d,  $J$  = 133.7 Hz), 129.5, 128.5 (d,  $J$  = 13.3 Hz), 128.3, 128.2 (d,  $J$  = 13.3 Hz), 127.4, 123.8, 76.6 (d,  $J$  = 5.4 Hz), 21.4, 10.6 (d,  $J$  = 4.8 Hz); <sup>31</sup>P NMR (162 MHz, CDCl<sub>3</sub>):  $\delta$  32.3; HRMS calc. for C<sub>21</sub>H<sub>21</sub>O<sub>2</sub>PI (M+H)<sup>+</sup>, 463.0324; found, 463.0328.

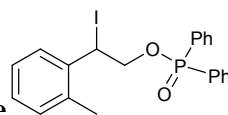

**2-iodo-2-o-tolyethyl diphenylphosphinate**

Compound **3da** was obtained in 64% yield according to the general procedure (20h). <sup>1</sup>H NMR (CDCl<sub>3</sub>, 400 MHz, ppm):  $\delta$  7.90-7.85 (m, 2H), 7.65-7.60 (m, 2H), 7.60-7.54 (m, 1H), 7.51-7.43 (m, 4H), 7.33-7.28 (m, 2H), 7.24-7.18 (m, 2H), 7.04 (t,  $J$  = 6.4 Hz, 1H), 5.70-5.65 (m, 1H), 3.72 (dd,  $J_1$  = 10.2 Hz,  $J_2$  = 6.0 Hz, 1H), 3.59 (dd,  $J_1$  = 10.1 Hz,  $J_2$  = 7.2 Hz, 1H), 2.09 (s, 3H); <sup>13</sup>C NMR (CDCl<sub>3</sub>, 100 MHz, ppm):  $\delta$  137.0 (d,  $J$  = 3.4 Hz), 135.2, 132.3 (d,  $J$  = 2.6 Hz), 132.1 (d,  $J$  = 2.5 Hz), 132.0 (d,  $J$  = 10.3 Hz), 131.6 (d,  $J$  = 10.3 Hz), 131.6 (d,  $J$  = 137.1 Hz), 130.9 (d,  $J$  = 133.7 Hz), 130.3, 128.6, 128.5 (d,  $J$  = 13.7 Hz), 128.2 (d,  $J$  = 13.1 Hz), 126.4, 126.3, 72.9 (d,  $J$  = 5.3 Hz), 19.2, 9.4 (d,  $J$  = 4.6 Hz); <sup>31</sup>P NMR (162 MHz, CDCl<sub>3</sub>):  $\delta$  32.1; HRMS calc. for C<sub>21</sub>H<sub>21</sub>O<sub>2</sub>PI (M+H)<sup>+</sup>, 463.0324; found, 463.0332.

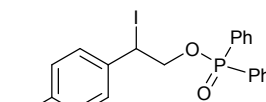

**2-(4-chlorophenyl)-2-iodoethyl diphenylphosphinate**

Compound **3ea** was obtained in 76% yield according to the general procedure (20h). <sup>1</sup>H NMR (CDCl<sub>3</sub>, 400 MHz, ppm):  $\delta$  7.90-7.85 (m, 2H), 7.70-7.64 (m, 2H), 7.60-7.56 (m, 1H), 7.52-7.47 (m, 3H), 7.39-7.35 (m, 2H), 7.28 (t,  $J$  = 3.3 Hz, 2H), 7.22 (d,  $J$  = 8.5 Hz, 2H), 5.43-5.38 (m, 1H), 3.66 (dd,  $J_1$  = 10.4 Hz,  $J_2$  = 5.2 Hz, 1H), 3.57 (dd,  $J_1$  = 10.3 Hz,  $J_2$  = 6.9 Hz, 1H); <sup>13</sup>C NMR (CDCl<sub>3</sub>, 100 MHz, ppm):  $\delta$  137.1 (d,  $J$  = 3.9 Hz), 134.6, 132.5 (d,  $J$  = 2.8 Hz), 132.4 (d,  $J$  = 2.8 Hz), 131.8 (d,  $J$  = 10.4 Hz), 131.6 (d,  $J$  = 10.4 Hz), 131.3 (d,  $J$  = 138.0 Hz), 130.7 (d,  $J$  = 133.9 Hz), 128.6, 128.6 (d,  $J$  = 13.3 Hz), 128.5 (d,  $J$  = 13.2 Hz), 128.1, 75.6 (d,  $J$  = 5.4 Hz), 10.3 (d,  $J$  = 4.5 Hz); <sup>31</sup>P NMR (162 MHz, CDCl<sub>3</sub>):  $\delta$  32.8; HRMS calc. for C<sub>20</sub>H<sub>18</sub>O<sub>2</sub>PClI (M+H)<sup>+</sup>, 482.9778; found, 482.9774.

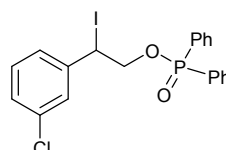

**2-(3-chlorophenyl)-2-iodoethyl diphenylphosphinate**

Compound **3fa** was obtained in 68% yield according to the general procedure (20h). <sup>1</sup>H NMR (CDCl<sub>3</sub>, 400 MHz, ppm): δ 7.91-7.86 (m, 2H), 7.67 (m, 2H), 7.61-7.57 (m, 1H), 7.53-7.48 (m, 3H), 7.39-7.35 (m, 2H), 7.27-7.22 (m, 3H), 7.17 (d, *J* = 7.4 Hz, 1H), 5.42-5.37 (m, 1H), 3.65 (dd, *J*<sub>1</sub> = 10.4 Hz, *J*<sub>2</sub> = 5.3 Hz, 1H), 3.57 (dd, *J*<sub>1</sub> = 10.4 Hz, *J*<sub>2</sub> = 6.7 Hz, 1H); <sup>13</sup>C NMR (CDCl<sub>3</sub>, 100 MHz, ppm): δ 140.5 (d, *J* = 3.8 Hz), 134.3, 132.5 (d, *J* = 2.8 Hz), 132.4 (d, *J* = 2.8 Hz), 131.9 (d, *J* = 10.4 Hz), 131.6 (d, *J* = 10.5 Hz), 131.2 (d, *J* = 139.7 Hz), 130.5 (d, *J* = 135.4 Hz), 129.7, 128.9, 128.6 (d, *J* = 13.4 Hz), 128.4 (d, *J* = 13.2 Hz), 126.8, 125.0, 75.4 (d, *J* = 5.3 Hz), 10.2 (d, *J* = 4.4 Hz); <sup>31</sup>P NMR (162 MHz, CDCl<sub>3</sub>): δ 32.9; HRMS calc. for C<sub>20</sub>H<sub>18</sub>O<sub>2</sub>PClI (M+H)<sup>+</sup>, 482.9778; found, 482.9776.

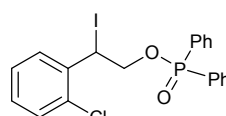

### 2-(2-chlorophenyl)-2-iodoethyl diphenylphosphinate

Compound **3ga** was obtained in 60% yield according to the general procedure (20h). <sup>1</sup>H NMR (CDCl<sub>3</sub>, 400 MHz, ppm): δ 7.94-7.89 (m, 2H), 7.77-7.72 (m, 2H), 7.61-7.57 (m, 2H), 7.53-7.47 (m, 3H), 7.40-7.35 (m, 2H), 7.32-7.25 (m, 3H), 5.77-5.72 (m, 1H), 3.73-3.67 (m, 2H); <sup>13</sup>C NMR (CDCl<sub>3</sub>, 100 MHz, ppm): δ 136.4 (d, *J* = 3.8 Hz), 132.5 (d, *J* = 2.6 Hz), 132.4 (d, *J* = 2.7 Hz), 131.9 (d, *J* = 10.5 Hz), 131.8, 131.7 (d, *J* = 10.5 Hz), 131.1 (d, *J* = 137.6 Hz), 130.7 (d, *J* = 134.4 Hz), 129.7, 129.5, 128.6 (d, *J* = 1.5 Hz), 128.5 (d, *J* = 1.7 Hz), 128.4, 126.8, 72.3 (d, *J* = 5.0 Hz), 10.3 (d, *J* = 4.5 Hz); <sup>31</sup>P NMR (162 MHz, CDCl<sub>3</sub>): δ 32.6; HRMS calc. for C<sub>20</sub>H<sub>18</sub>O<sub>2</sub>PClI (M+H)<sup>+</sup>, 482.9778; found, 482.9774.

### 2-(4-(chloromethyl)phenyl)-2-iodoethyl

### diphenylphosphinate

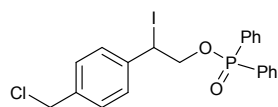

Compound **3ha** was obtained in 63% yield according to the general procedure (24h). <sup>1</sup>H NMR (CDCl<sub>3</sub>, 400 MHz, ppm): δ 7.91-7.86 (m, 2H), 7.69-7.64 (m, 2H), 7.59-7.55 (m, 1H), 7.51-7.46 (m, 3H), 7.37-7.32 (m, 4H), 7.28 (d, *J* = 7.2 Hz, 2H), 5.45-5.40 (m, 1H), 4.58 (s, 2H), 3.69 (dd, *J*<sub>1</sub> = 10.4 Hz, *J*<sub>2</sub> = 5.4 Hz, 1H), 3.59 (dd, *J*<sub>1</sub> = 10.3 Hz, *J*<sub>2</sub> = 6.8 Hz, 1H); <sup>13</sup>C NMR (CDCl<sub>3</sub>, 100 MHz, ppm): δ 138.7 (d, *J* = 3.8 Hz), 137.9, 132.4 (d, *J* = 2.8 Hz), 132.3 (d, *J* = 2.8 Hz), 131.9 (d, *J* = 10.4 Hz), 131.6 (d, *J* = 10.4 Hz), 131.4 (d, *J* = 137.8 Hz), 130.8 (d, *J* = 133.9 Hz), 128.6, 128.5 (d, *J* = 13.6 Hz), 128.4 (d, *J* = 13.2 Hz), 127.1, 75.9 (d, *J* = 5.4 Hz), 45.7, 10.4 (d, *J* = 4.5 Hz); <sup>31</sup>P NMR (162

MHz, CDCl<sub>3</sub>):  $\delta$  32.5; HRMS calc. for C<sub>21</sub>H<sub>20</sub>O<sub>2</sub>PClI (M+H)<sup>+</sup>, 496.9934; found, 496.9944.

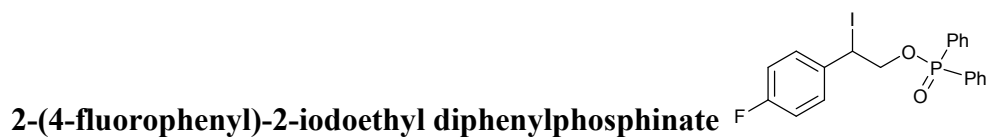

Compound **3ia** was obtained in 74% yield according to the general procedure (24h). <sup>1</sup>H NMR (CDCl<sub>3</sub>, 400 MHz, ppm):  $\delta$  7.90-7.85 (m, 2H), 7.69-7.63 (m, 2H), 7.60-7.56 (m, 1H), 7.52-7.46 (m, 3H), 7.38-7.33 (m, 2H), 7.28-7.24 (m, 2H), 7.02-6.96 (m, 2H), 5.45-5.40 (m, 1H), 3.68 (dd,  $J_1 = 10.4$  Hz,  $J_2 = 5.4$  Hz, 1H), 3.57 (dd,  $J_1 = 10.3$  Hz,  $J_2 = 6.9$  Hz, 1H); <sup>13</sup>C NMR (CDCl<sub>3</sub>, 100 MHz, ppm):  $\delta$  162.5 (d,  $J = 198.2$  Hz), 134.4 (t,  $J = 3.5$  Hz), 132.4 (d,  $J = 2.8$  Hz), 132.3 (d,  $J = 2.8$  Hz), 131.9 (d,  $J = 10.3$  Hz), 131.6 (d,  $J = 10.3$  Hz), 131.4 (d,  $J = 138.1$  Hz), 130. (d,  $J = 133.9$  Hz), 128.6 (d,  $J = 5.2$  Hz), 128.5 (d,  $J = 5.7$  Hz), 128.3, 115.3 (d,  $J = 21.6$  Hz), 75.6 (d,  $J = 5.5$  Hz), 10.5 (d,  $J = 4.7$  Hz); <sup>31</sup>P NMR (162 MHz, CDCl<sub>3</sub>):  $\delta$  32.5; HRMS calc. for C<sub>20</sub>H<sub>18</sub>O<sub>2</sub>PIF (M+H)<sup>+</sup>, 467.0073; found, 467.0065.

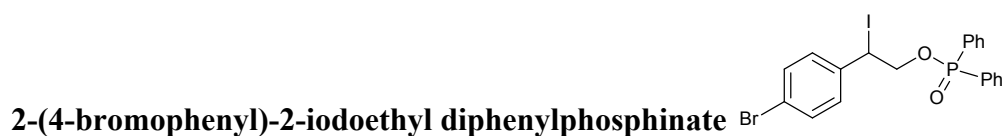

Compound **3ja** was obtained in 72% yield according to the general procedure (24h). <sup>1</sup>H NMR (CDCl<sub>3</sub>, 400 MHz, ppm):  $\delta$  7.90-7.84 (m, 2H), 7.70-7.64 (m, 2H), 7.60-7.56 (m, 1H), 7.52-7.48 (m, 3H), 7.44 (d,  $J = 8.4$  Hz, 2H), 7.36 (t,  $J = 3.9$  Hz, 2H), 7.16 (d,  $J = 8.4$  Hz, 2H), 5.41-5.35 (m, 1H), 3.66 (dd,  $J_1 = 10.4$  Hz,  $J_2 = 5.2$  Hz, 1H), 3.56 (dd,  $J_1 = 10.3$  Hz,  $J_2 = 6.9$  Hz, 1H); <sup>13</sup>C NMR (CDCl<sub>3</sub>, 100 MHz, ppm):  $\delta$  137.6 (d,  $J = 3.9$  Hz), 132.5 (d,  $J = 2.8$  Hz), 132.4 (d,  $J = 2.8$  Hz), 131.8 (d,  $J = 10.4$  Hz), 131.6 (d,  $J = 10.4$  Hz), 131.6, 131.3 (d,  $J = 137.9$  Hz), 130.7 (d,  $J = 133.7$  Hz), 128.6 (d,  $J = 13.4$  Hz), 128.5 (d,  $J = 14.2$  Hz), 128.4, 122.8, 75.6 (d,  $J = 5.3$  Hz), 10.2 (d,  $J = 4.5$  Hz); <sup>31</sup>P NMR (162 MHz, CDCl<sub>3</sub>):  $\delta$  32.7; HRMS calc. for C<sub>20</sub>H<sub>18</sub>O<sub>2</sub>PBrI (M+H)<sup>+</sup>, 526.9272; found, 526.9276.

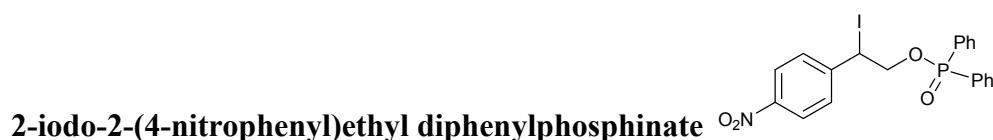

Compound **3ka** was obtained in 70% yield according to the general procedure (24h). <sup>1</sup>H NMR (CDCl<sub>3</sub>, 400 MHz, ppm):  $\delta$  8.18 (d,  $J = 8.7$  Hz, 2H), 7.92-7.87 (m, 2H), 7.72-7.67 (m, 2H), 7.61 (t,  $J = 7.4$  Hz, 1H), 7.54-7.48 (m, 5H), 7.41-7.36 (m, 2H),

5.54-5.49 (m, 1H), 3.67-3.57 (m, 2H);  $^{13}\text{C}$  NMR ( $\text{CDCl}_3$ , 100 MHz, ppm):  $\delta$  147.9, 145.6 (d,  $J = 3.8$  Hz), 132.8 (d,  $J = 2.8$  Hz), 132.7 (d,  $J = 2.8$  Hz), 131.7 (d,  $J = 9.4$  Hz), 131.6 (d,  $J = 9.5$  Hz), 130.8 (d,  $J = 137.2$  Hz), 130.4 (d,  $J = 134.3$  Hz), 128.8 (d,  $J = 13.6$  Hz), 128.6 (d,  $J = 13.4$  Hz), 127.6, 123.7, 74.6 (d,  $J = 5.1$  Hz), 9.8 (d,  $J = 4.7$  Hz);  $^{31}\text{P}$  NMR (162 MHz,  $\text{CDCl}_3$ ):  $\delta$  33.5; HRMS calc. for  $\text{C}_{20}\text{H}_{18}\text{NO}_4\text{PI}$  ( $\text{M}+\text{H}$ ) $^+$ , 494.0018; found, 494.0018.

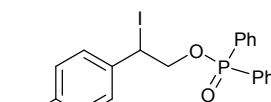

**2-(4-cyanophenyl)-2-iodoethyl diphenylphosphinate**

Compound **3la** was obtained in 83% yield according to the general procedure (24h).  $^1\text{H}$  NMR ( $\text{CDCl}_3$ , 400 MHz, ppm):  $\delta$  7.90-7.85 (m, 2H), 7.70-7.65 (m, 2H), 7.60 (t,  $J = 8.4$  Hz, 3H), 7.53-7.49 (m, 3H), 7.42-7.35 (m, 4H), 5.48-5.43 (m, 1H), 3.63-3.55 (m, 2H);  $^{13}\text{C}$  NMR ( $\text{CDCl}_3$ , 100 MHz, ppm):  $\delta$  143.7 (d,  $J = 3.7$  Hz), 132.7 (d,  $J = 2.8$  Hz), 132.6 (d,  $J = 2.7$  Hz), 132.3, 131.7 (d,  $J = 10.6$  Hz), 131.6 (d,  $J = 10.6$  Hz), 130.9 (d,  $J = 137.3$  Hz), 130.5 (d,  $J = 134.3$  Hz), 128.7 (d,  $J = 13.4$  Hz), 128.5 (d,  $J = 13.3$  Hz), 127.4, 118.4, 112.6, 74.8 (d,  $J = 5.2$  Hz), 9.8 (d,  $J = 4.5$  Hz);  $^{31}\text{P}$  NMR (162 MHz,  $\text{CDCl}_3$ ):  $\delta$  33.2; HRMS calc. for  $\text{C}_{21}\text{H}_{18}\text{NO}_2\text{PI}$  ( $\text{M}+\text{H}$ ) $^+$ , 474.0120; found, 474.0124.

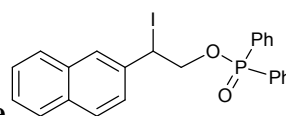

**2-iodo-2-(naphthalen-2-yl)ethyl diphenylphosphinate**

Compound **3ma** was obtained in 71% yield according to the general procedure (24h).  $^1\text{H}$  NMR ( $\text{CDCl}_3$ , 400 MHz, ppm):  $\delta$  7.94-7.89 (m, 2H), 7.85-7.78 (m, 3H), 7.71-7.65 (m, 3H), 7.59-7.55 (m, 1H), 7.52-7.48 (m, 4H), 7.45 (dd,  $J_1 = 8.5$  Hz,  $J_2 = 1.6$  Hz, 1H), 7.42-7.38 (m, 1H), 7.30-7.25 (m, 2H), 5.64-5.59 (m, 1H), 3.81 (dd,  $J_1 = 10.3$  Hz,  $J_2 = 5.4$  Hz, 1H), 3.71 (dd,  $J_1 = 10.3$  Hz,  $J_2 = 7.0$  Hz, 1H);  $^{13}\text{C}$  NMR ( $\text{CDCl}_3$ , 100 MHz, ppm):  $\delta$  135.7 (d,  $J = 4.0$  Hz), 133.4, 132.8, 132.4 (d,  $J = 2.8$  Hz), 132.2 (d,  $J = 2.8$  Hz), 131.9 (d,  $J = 10.4$  Hz), 131.6 (d,  $J = 10.3$  Hz), 131.5 (d,  $J = 138.5$  Hz), 130.9 (d,  $J = 133.4$  Hz), 128.5 (d,  $J = 13.1$  Hz), 128.3 (d,  $J = 13.5$  Hz), 128.2, 127.7, 126.8, 126.5, 126.4, 123.6, 76.7 (d,  $J = 5.6$  Hz), 10.4 (d,  $J = 4.3$  Hz);  $^{31}\text{P}$  NMR (162 MHz,  $\text{CDCl}_3$ ):  $\delta$  32.5; HRMS calc. for  $\text{C}_{24}\text{H}_{21}\text{O}_2\text{PI}$  ( $\text{M}+\text{H}$ ) $^+$ , 499.0324; found, 499.0323.

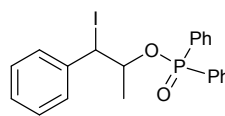

**1-iodo-1-phenylpropan-2-yl diphenylphosphinate**

Compound **3na** was obtained in 67% yield according to the general procedure (24h).  $^1\text{H}$  NMR ( $\text{CDCl}_3$ , 400 MHz, ppm):  $\delta$  7.90-7.85 (m, 2H), 7.60-7.55 (m, 3H), 7.51-7.47

(m, 2H), 7.41 (t,  $J = 7.5$  Hz, 1H), 7.28-7.24 (m, 7H), 5.23-5.19 (m, 1H), 4.61-4.54 (m, 1H), 1.97 (d,  $J = 1.7$  Hz, 3H);  $^{13}\text{C}$  NMR ( $\text{CDCl}_3$ , 100 MHz, ppm):  $\delta$  137.7 (d,  $J = 2.7$  Hz), 132.3 (d,  $J = 2.8$  Hz), 132.0 (d,  $J = 2.8$  Hz), 131.9 (d,  $J = 10.4$  Hz), 131.6 (d,  $J = 10.3$  Hz), 131.5 (d,  $J = 139.4$  Hz), 130.9 (d,  $J = 133.1$  Hz), 128.6, 128.5 (d,  $J = 13.4$  Hz), 128.1 (d,  $J = 13.2$  Hz), 127.9, 127.6, 80.6 (d,  $J = 5.7$  Hz), 31.2 (d,  $J = 5.3$  Hz), 24.4;  $^{31}\text{P}$  NMR (162 MHz,  $\text{CDCl}_3$ ):  $\delta$  32.2; HRMS calc. for  $\text{C}_{21}\text{H}_{21}\text{O}_2\text{PI}$  ( $\text{M}+\text{H}$ ) $^+$ , 463.0324; found, 463.0329.

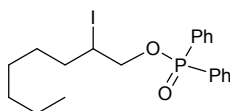

### 2-iodooctyl diphenylphosphinate

Compound **30a** was obtained in 56% yield according to the general procedure (24h).  $^1\text{H}$  NMR ( $\text{CDCl}_3$ , 400 MHz, ppm):  $\delta$  7.89-7.82 (m, 4H), 7.57-7.53 (m, 2H), 7.50-7.45 (m, 4H), 4.21-4.16 (m, 1H), 3.42 (d,  $J = 4.4$  Hz, 2H), 1.81-1.74 (m, 2H), 1.27-1.22 (m, 8H), 0.86 (t,  $J = 6.7$  Hz, 3H);  $^{13}\text{C}$  NMR ( $\text{CDCl}_3$ , 100 MHz, ppm):  $\delta$  132.3 (d,  $J = 2.3$  Hz), 131.8 (t,  $J = 136.7$  Hz), 131.7 (t,  $J = 11.2$  Hz), 128.6 (d,  $J = 2.9$  Hz), 128.5 (d,  $J = 2.8$  Hz), 73.7 (d,  $J = 6.0$  Hz), 35.8 (d,  $J = 4.2$  Hz), 31.6, 28.8, 24.5, 22.5, 14.1, 11.4;  $^{31}\text{P}$  NMR (162 MHz,  $\text{CDCl}_3$ ):  $\delta$  31.2; HRMS calc. for  $\text{C}_{20}\text{H}_{27}\text{O}_2\text{PI}$  ( $\text{M}+\text{H}$ ) $^+$ , 457.0793; found, 457.0804.

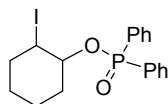

### 2-iodocyclohexyl diphenylphosphinate

Compound **3pa** was obtained in 68% yield according to the general procedure (24h).  $^1\text{H}$  NMR ( $\text{CDCl}_3$ , 400 MHz, ppm):  $\delta$  7.93-7.88 (m, 4H), 7.57-7.53 (m, 2H), 7.50-7.46 (m, 4H), 4.52-4.45 (m, 1H), 3.35-4.30 (m, 1H), 2.43-2.33 (m, 2H), 2.02-1.94 (m, 1H), 1.83-1.77 (m, 1H), 1.66-1.57 (m, 2H), 1.44-1.36 (m, 2H);  $^{13}\text{C}$  NMR ( $\text{CDCl}_3$ , 100 MHz, ppm):  $\delta$  132.2 (d,  $J = 138.0$  Hz), 132.1 (t,  $J = 2.1$  Hz), 132.0 (t,  $J = 10.4$  Hz), 131.7 (d,  $J = 10.1$  Hz), 131.4 (d,  $J = 135.7$  Hz), 128.5 (d,  $J = 5.2$  Hz), 128.4 (d,  $J = 5.3$  Hz), 78.7 (d,  $J = 6.0$  Hz), 36.3, 33.1 (d,  $J = 6.7$  Hz), 32.5, 25.8, 22.8;  $^{31}\text{P}$  NMR (162 MHz,  $\text{CDCl}_3$ ):  $\delta$  30.5; HRMS calc. for  $\text{C}_{18}\text{H}_{21}\text{O}_2\text{PI}$  ( $\text{M}+\text{H}$ ) $^+$ , 427.0324; found, 427.0327.

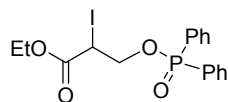

### ethyl 3-(diphenylphosphoryloxy)-2-iodopropanoate

Compound **3qa** was obtained in 55% yield according to the general procedure (24h).  $^1\text{H}$  NMR ( $\text{CDCl}_3$ , 400 MHz, ppm):  $\delta$  7.86-7.77 (m, 4H), 7.60-7.54 (m, 2H), 7.52-7.45

(m, 4H), 4.62-4.58 (m, 1H), 4.46-4.39 (m, 1H), 4.35-4.29 (m, 1H), 4.24 (q,  $J = 7.1$  Hz, 2H), 1.28 (t,  $J = 7.1$  Hz, 3H);  $^{13}\text{C}$  NMR ( $\text{CDCl}_3$ , 100 MHz, ppm):  $\delta$  169.4, 132.5 (t,  $J = 2.8$  Hz), 132.4 (t,  $J = 2.7$  Hz), 131.8 (d,  $J = 10.3$  Hz), 131.5 (d,  $J = 10.3$  Hz), 131.0 (d,  $J = 136.2$  Hz), 130.6 (d,  $J = 134.8$  Hz), 128.7 (d,  $J = 8.0$  Hz), 128.5 (d,  $J = 8.0$  Hz), 65.8 (d,  $J = 5.3$  Hz), 62.2, 16.8 (d,  $J = 7.0$  Hz), 13.7;  $^{31}\text{P}$  NMR (162 MHz,  $\text{CDCl}_3$ ):  $\delta$  32.6; HRMS calc. for  $\text{C}_{17}\text{H}_{19}\text{O}_4\text{PI}$  ( $\text{M}+\text{H}$ ) $^+$ , 445.0066; found, 445.0067.

### 3-(N-allyl-4-methylphenylsulfonamido)-2-iodopropyl diphenylphosphinate

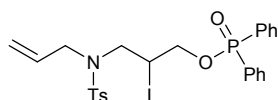

Compound **3ra** was obtained in 45% yield according to the general procedure (24h).  $^1\text{H}$  NMR ( $\text{CDCl}_3$ , 400 MHz, ppm):  $\delta$  7.93-7.88 (m, 4H), 7.69 (d,  $J = 1.7$  Hz, 2H), 7.57 (t,  $J = 7.4$  Hz, 2H), 7.52-7.48 (m, 4H), 7.29 (d,  $J = 8.1$  Hz, 2H), 5.54-5.46 (m, 1H), 5.08 (d,  $J = 5.5$  Hz, 1H), 5.04 (s, 1H), 4.61-4.55 (m, 1H), 4.35-4.29 (m, 1H), 4.27-4.21 (m, 1H), 3.93 (dd,  $J_1 = 6.5$  Hz,  $J_2 = 15.6$  Hz, 1H), 3.78 (dd,  $J_1 = 6.9$  Hz,  $J_2 = 15.6$  Hz, 1H), 3.64 (dd,  $J_1 = 8.4$  Hz,  $J_2 = 15.0$  Hz, 1H), 3.45 (dd,  $J_1 = 6.8$  Hz,  $J_2 = 15.0$  Hz, 1H), 2.44 (s, 3H);  $^{13}\text{C}$  NMR ( $\text{CDCl}_3$ , 100 MHz, ppm):  $\delta$  143.8, 135.9, 132.5 (t,  $J = 2.3$  Hz), 132.2, 131.8 (d,  $J = 10.3$  Hz), 131.7 (d,  $J = 10.2$  Hz), 130.7 (d,  $J = 135.1$  Hz), 129.9, 129.6 (d,  $J = 146.5$  Hz), 128.6 (d,  $J = 13.2$  Hz), 120.3, 66.3 (d,  $J = 5.2$  Hz), 52.4, 52.0, 28.0 (d,  $J = 8.1$  Hz), 21.5;  $^{31}\text{P}$  NMR (162 MHz,  $\text{CDCl}_3$ ):  $\delta$  32.1; HRMS calc. for  $\text{C}_{25}\text{H}_{28}\text{O}_4\text{PSIN}$  ( $\text{M}+\text{H}$ ) $^+$ , 596.0521; found, 596.0525.

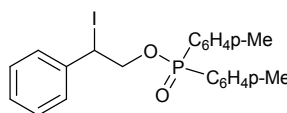

### 2-iodo-2-phenylethyl dip-tolylphosphinate

Compound **3ab** was obtained in 76% yield according to the general procedure (18h).  $^1\text{H}$  NMR ( $\text{CDCl}_3$ , 400 MHz, ppm):  $\delta$  7.78-7.73 (m, 2H), 7.59-7.54 (m, 2H), 7.33-7.27 (m, 7H), 7.16-7.13 (m, 2H), 5.41-5.36 (m, 1H), 3.69 (dd,  $J_1 = 2.6$  Hz,  $J_2 = 1.3$  Hz, 1H), 3.60 (dd,  $J_1 = 2.6$  Hz,  $J_2 = 1.7$  Hz, 1H), 2.41 (s, 3H), 2.35 (s, 3H);  $^{13}\text{C}$  NMR ( $\text{CDCl}_3$ , 100 MHz, ppm):  $\delta$  142.8 (d,  $J = 3.0$  Hz), 142.7 (d,  $J = 2.9$  Hz), 138.8 (d,  $J = 4.1$  Hz), 131.9 (d,  $J = 10.7$  Hz), 131.6 (d,  $J = 10.8$  Hz), 129.2 (d,  $J = 13.9$  Hz), 129.1 (d,  $J = 13.9$  Hz), 128.6, 128.5 (d,  $J = 140.3$  Hz), 128.4, 127.8 (d,  $J = 136.5$  Hz), 126.7, 76.0 (d,  $J = 5.4$  Hz), 21.7 (d,  $J = 0.9$  Hz), 21.6 (d,  $J = 1.0$  Hz), 11.2 (d,  $J = 4.2$  Hz);  $^{31}\text{P}$  NMR (162 MHz,  $\text{CDCl}_3$ ):  $\delta$  33.5; HRMS calc. for  $\text{C}_{22}\text{H}_{22}\text{O}_2\text{IPNa}$  ( $\text{M}+\text{Na}$ ) $^+$ , 499.0300; found, 499.0303.

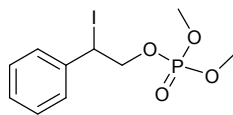

**2-iodo-2-phenylethyl dimethyl phosphate**

Compound **3ac** was obtained in 52% yield according to the general procedure (14h).

$^1\text{H}$  NMR ( $\text{CDCl}_3$ , 400 MHz, ppm):  $\delta$  7.42-7.38 (m, 5H), 5.46-5.41 (m, 1H), 3.79 (d,  $J = 11.2$  Hz, 3H), 3.61-3.50 (m, 5H);  $^{13}\text{C}$  NMR ( $\text{CDCl}_3$ , 100 MHz, ppm):  $\delta$  138.3 (d,  $J = 2.9$  Hz), 129.1, 128.7, 126.4, 79.5 (d,  $J = 5.0$  Hz), 54.7 (d,  $J = 5.9$  Hz), 54.3 (d,  $J = 6.0$  Hz), 9.0 (d,  $J = 8.1$  Hz);  $^{31}\text{P}$  NMR (162 MHz,  $\text{CDCl}_3$ ):  $\delta$  -0.01; HRMS calc. for  $\text{C}_{10}\text{H}_{14}\text{O}_4\text{PNa}$  ( $\text{M}+\text{Na}$ ) $^+$ , 378.9572; found, 378.9574.

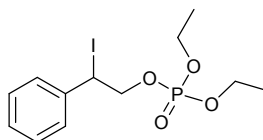

**diethyl 2-iodo-2-phenylethyl phosphate**

Compound **3ad** was obtained in 51% yield according to the general procedure (14h).

$^1\text{H}$  NMR ( $\text{CDCl}_3$ , 400 MHz, ppm):  $\delta$  7.41-7.38 (m, 5H), 5.45-5.40 (m, 1H), 4.22-4.08 (m, 2H), 3.95-3.89 (m, 2H), 3.61-3.50 (m, 2H), 1.32 (dt,  $J_1 = 7.8$  Hz,  $J_2 = 0.7$  Hz, 3H), 1.16 (dt,  $J_1 = 7.8$  Hz,  $J_2 = 0.7$  Hz, 3H);  $^{13}\text{C}$  NMR ( $\text{CDCl}_3$ , 100 MHz, ppm):  $\delta$  138.4 (d,  $J = 3.0$  Hz), 129.0, 128.6, 126.5, 79.2 (d,  $J = 5.0$  Hz), 64.2 (d,  $J = 5.8$  Hz), 63.9 (d,  $J = 5.8$  Hz), 16.1 (d,  $J = 7.1$  Hz), 15.9 (d,  $J = 7.0$  Hz), 9.3 (d,  $J = 8.1$  Hz);  $^{31}\text{P}$  NMR (162 MHz,  $\text{CDCl}_3$ ):  $\delta$  -2.42; HRMS calc. for  $\text{C}_{12}\text{H}_{19}\text{O}_4\text{PI}$  ( $\text{M}+\text{H}$ ) $^+$ , 385.0066; found, 385.0066.

## 5. Copies of NMR spectra for 3aa–3ad

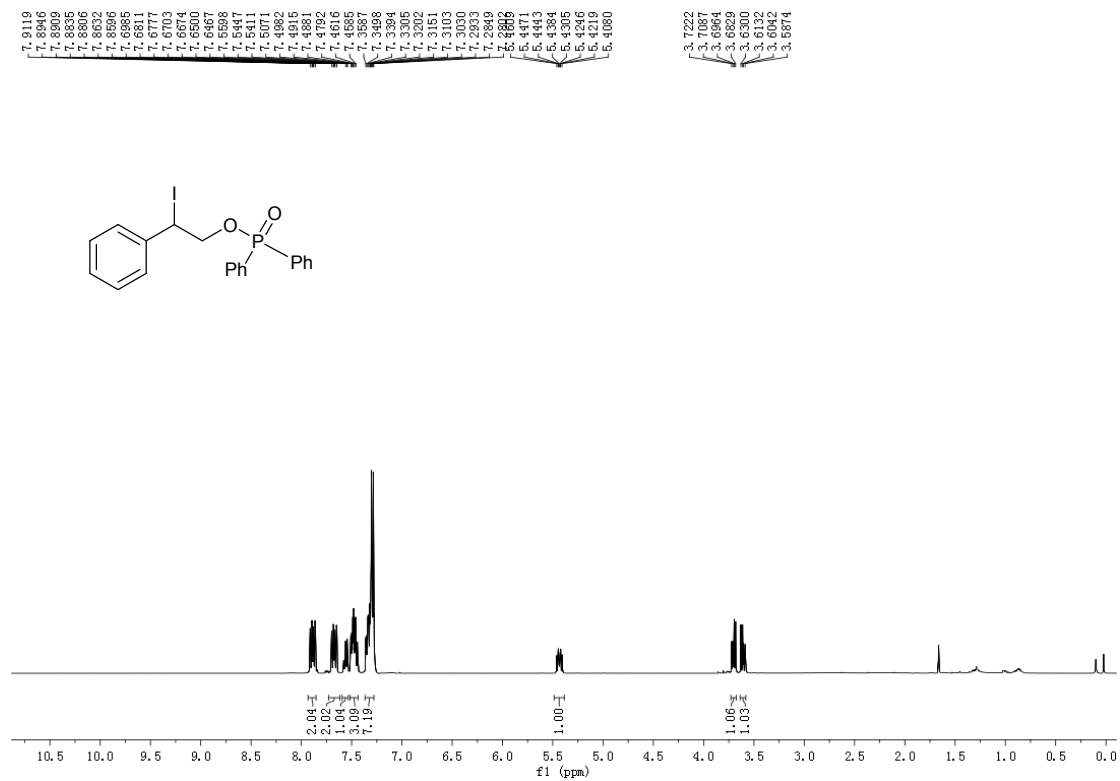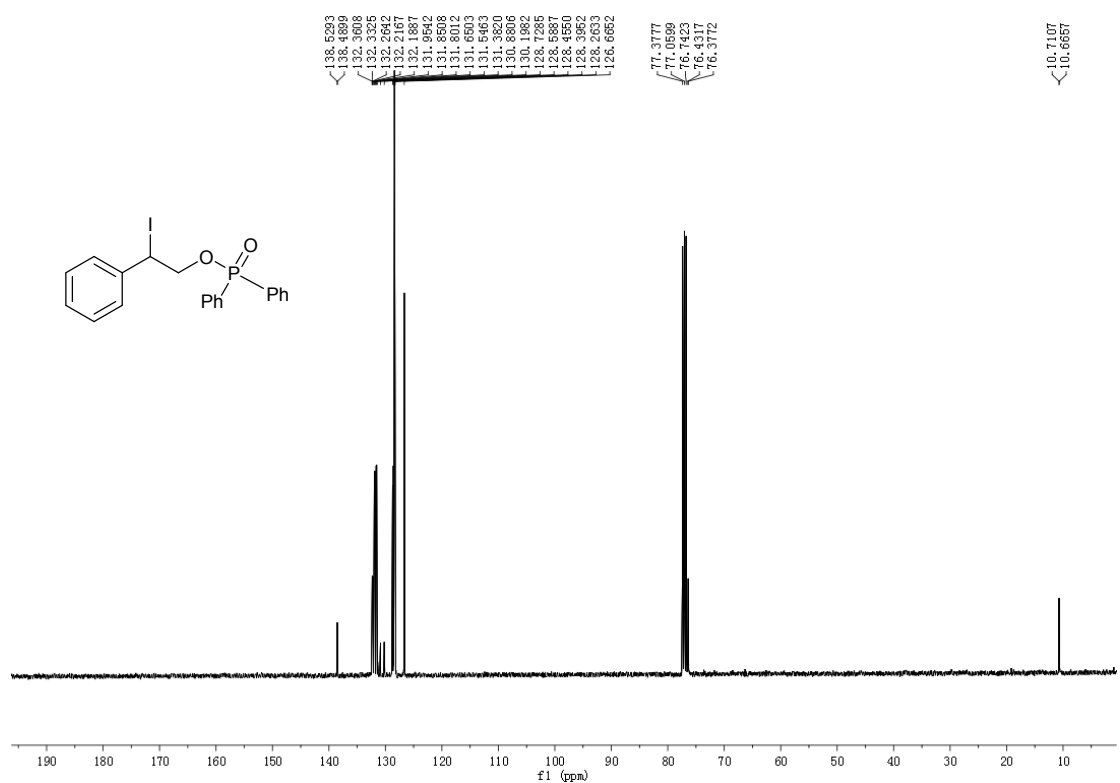



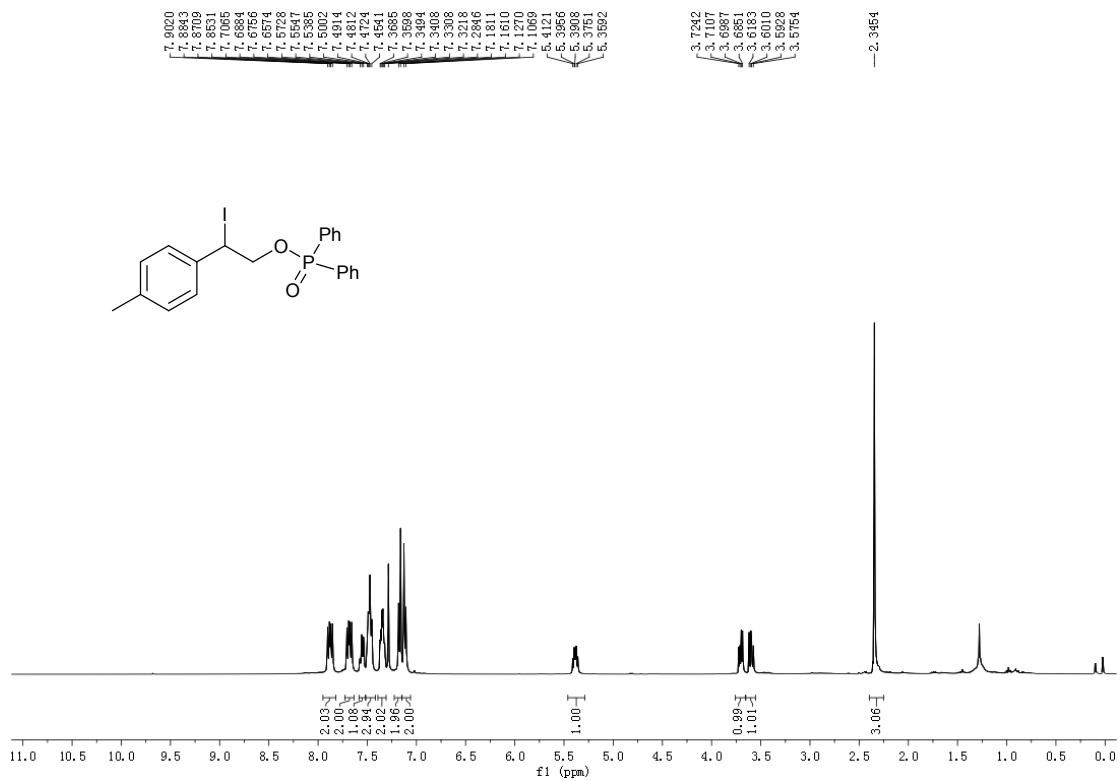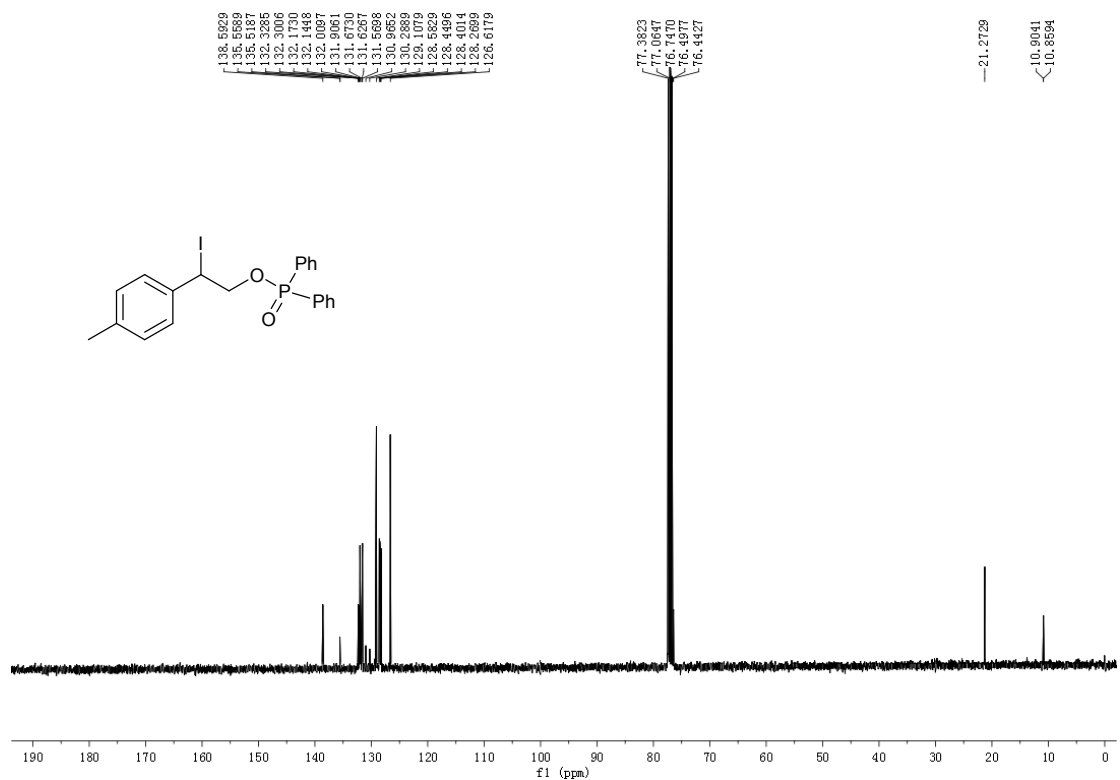

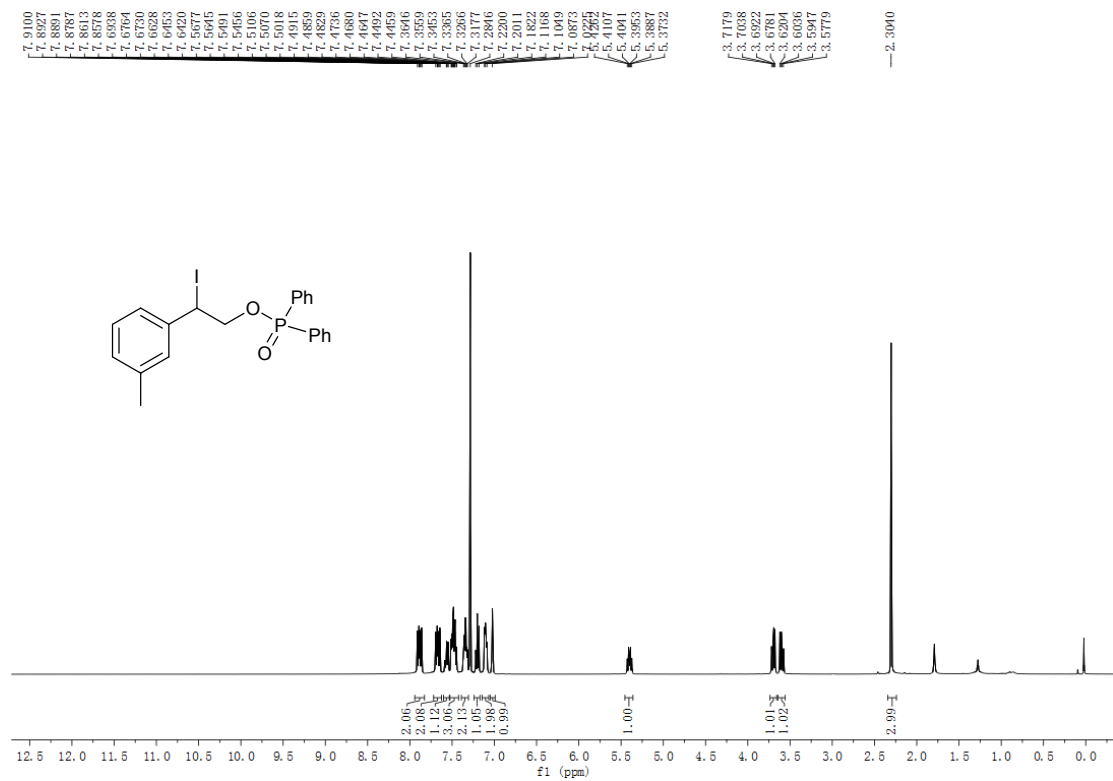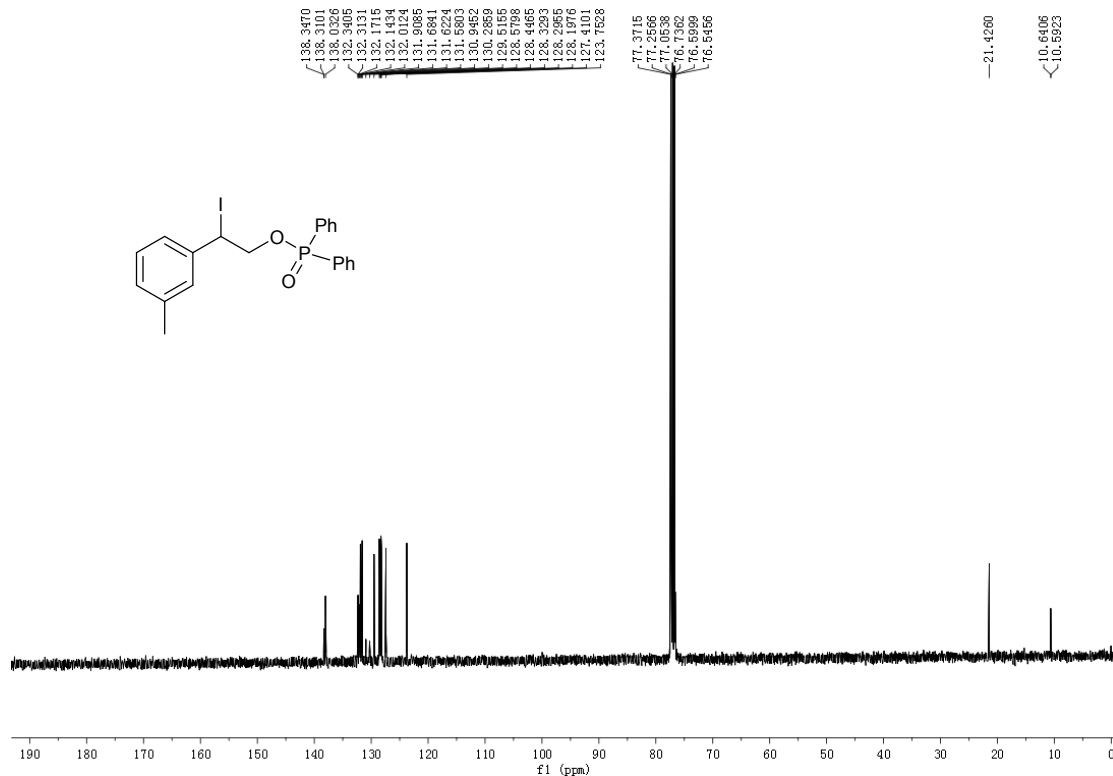

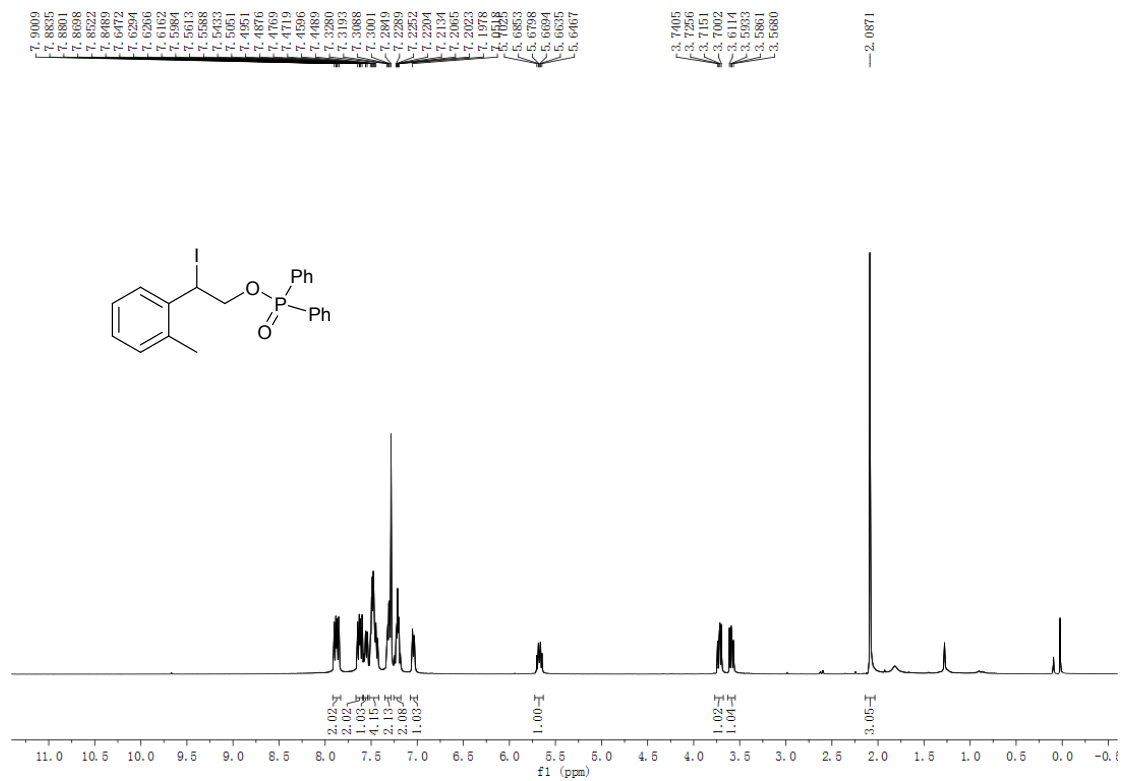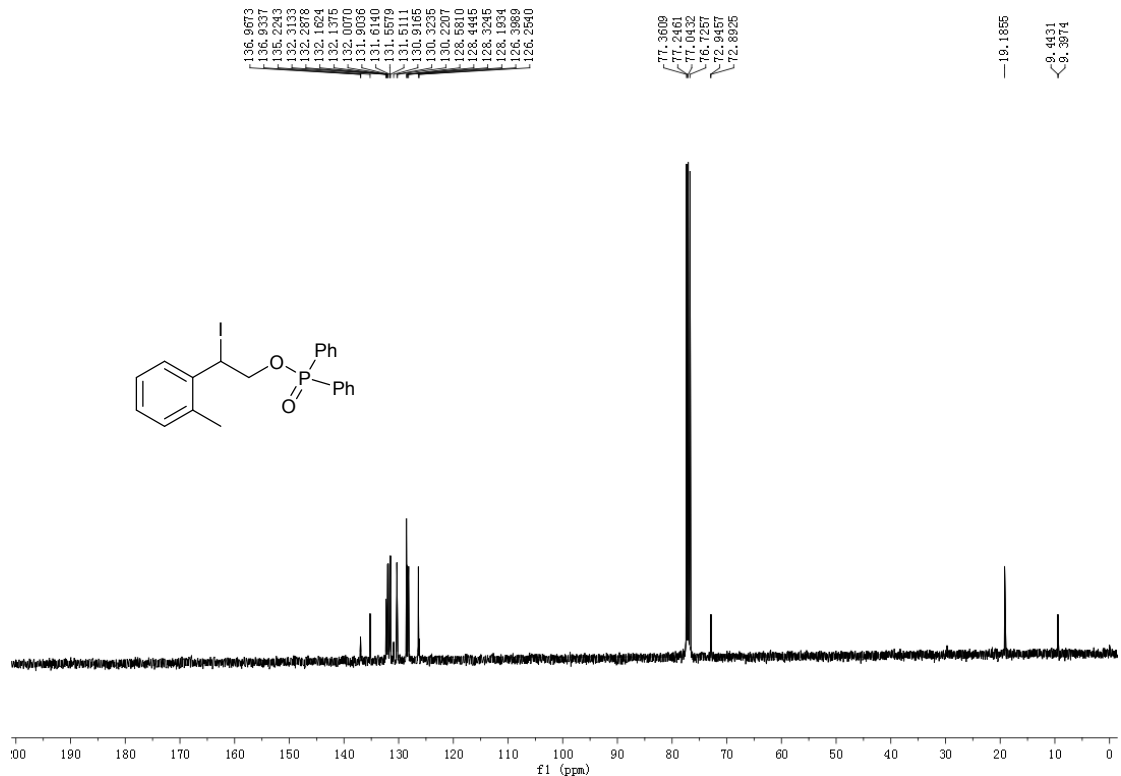

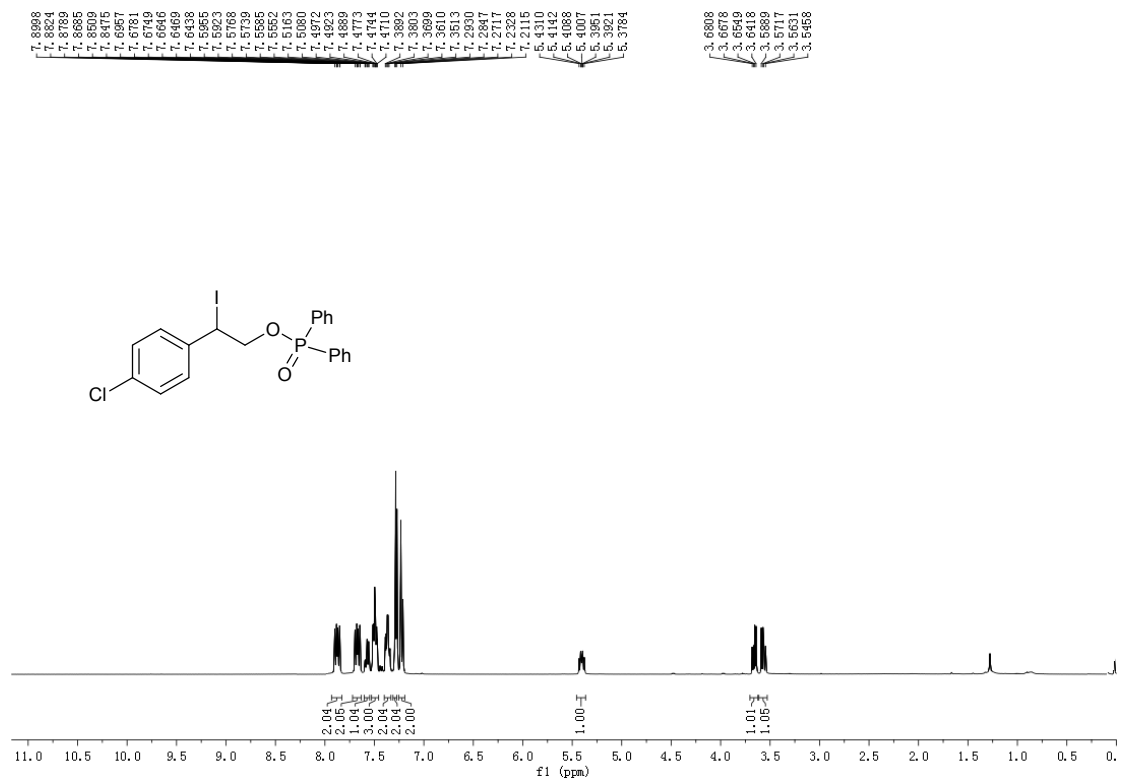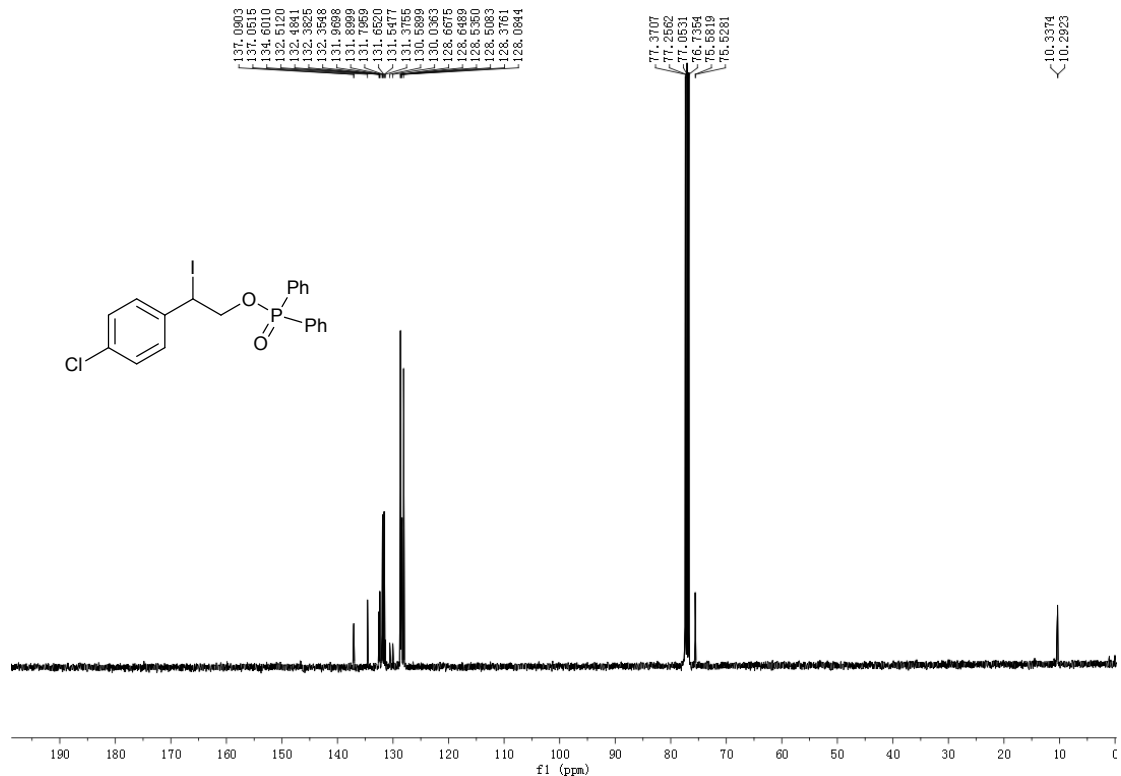

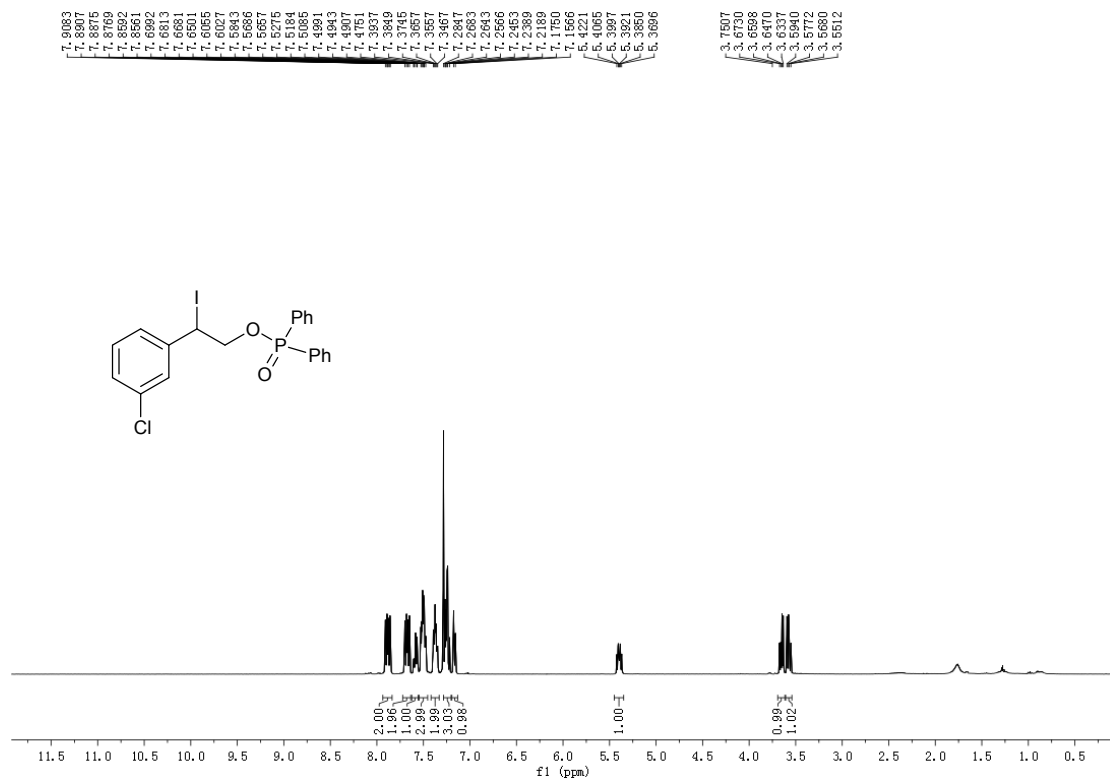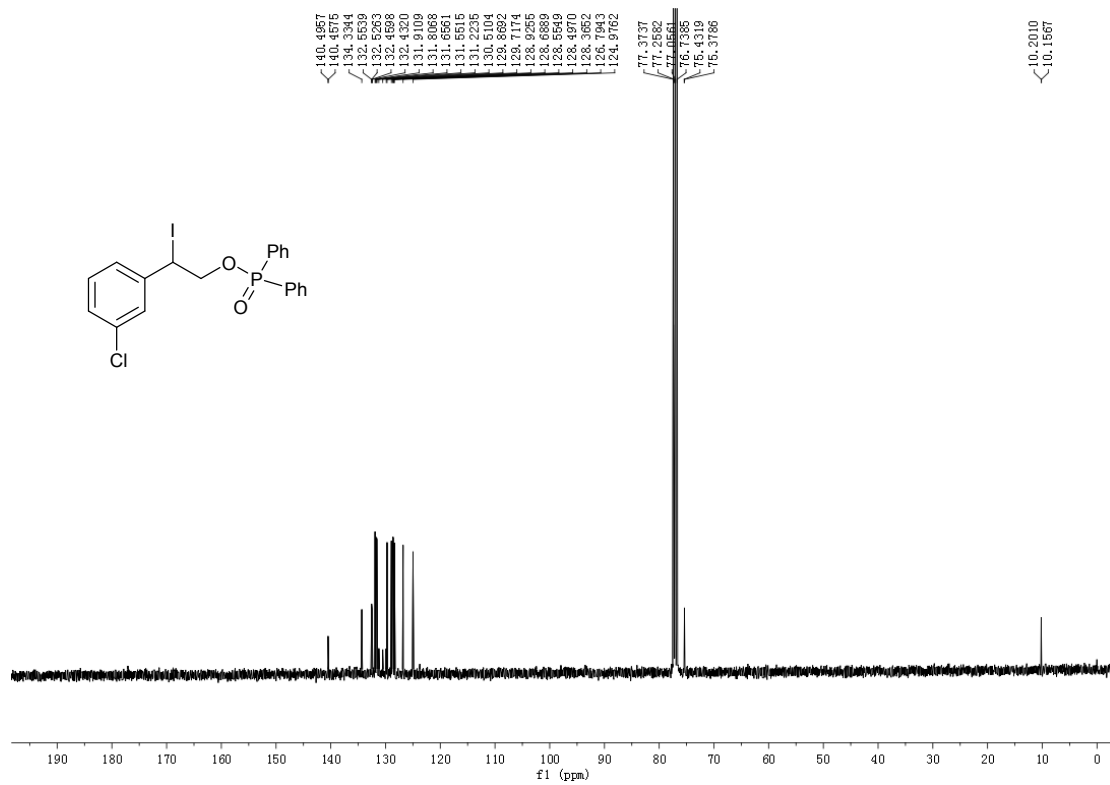

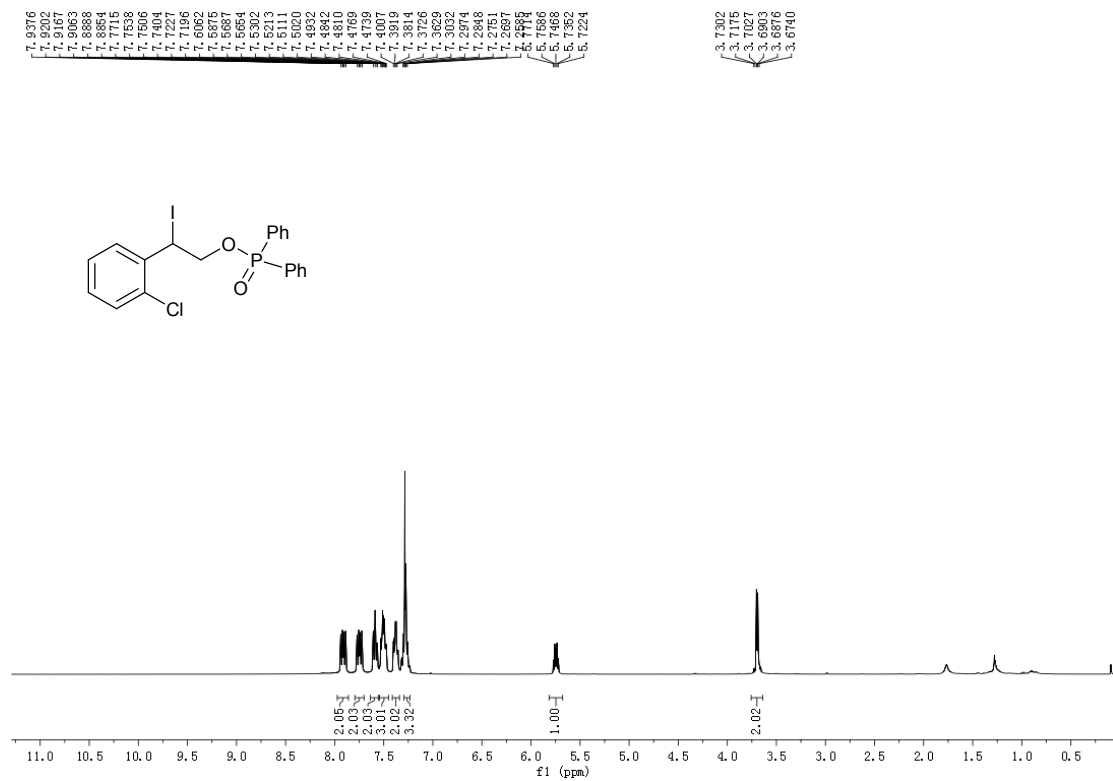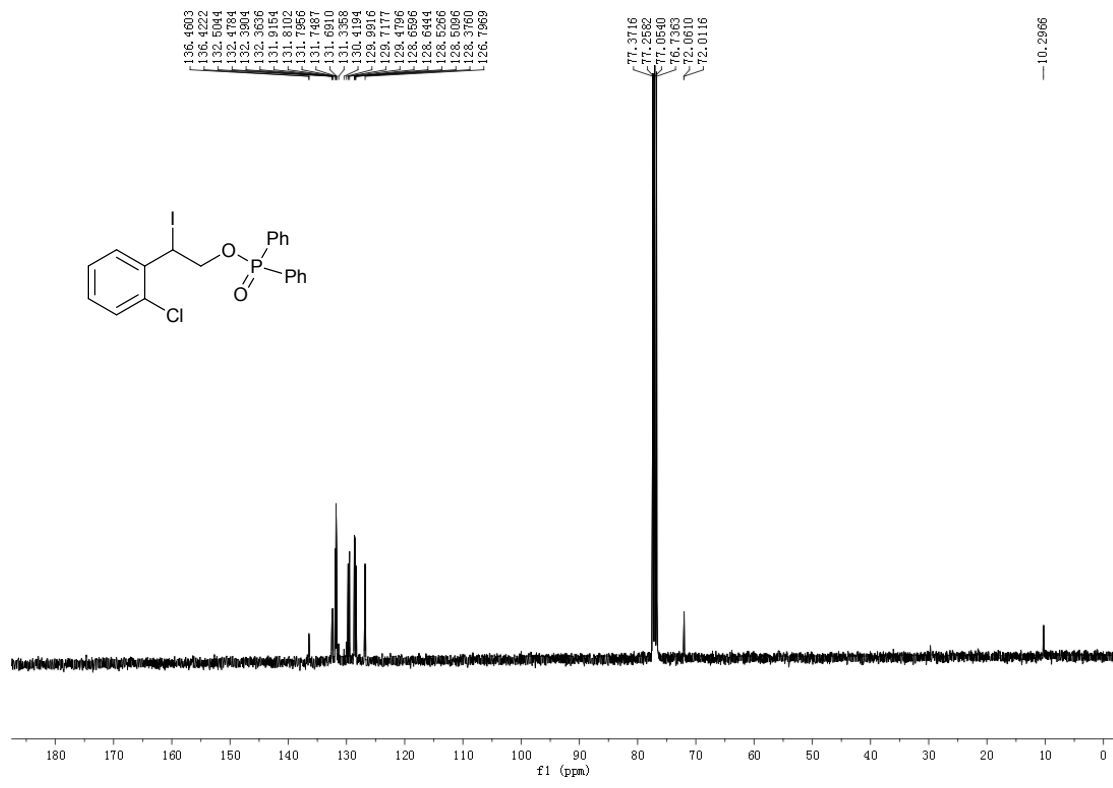

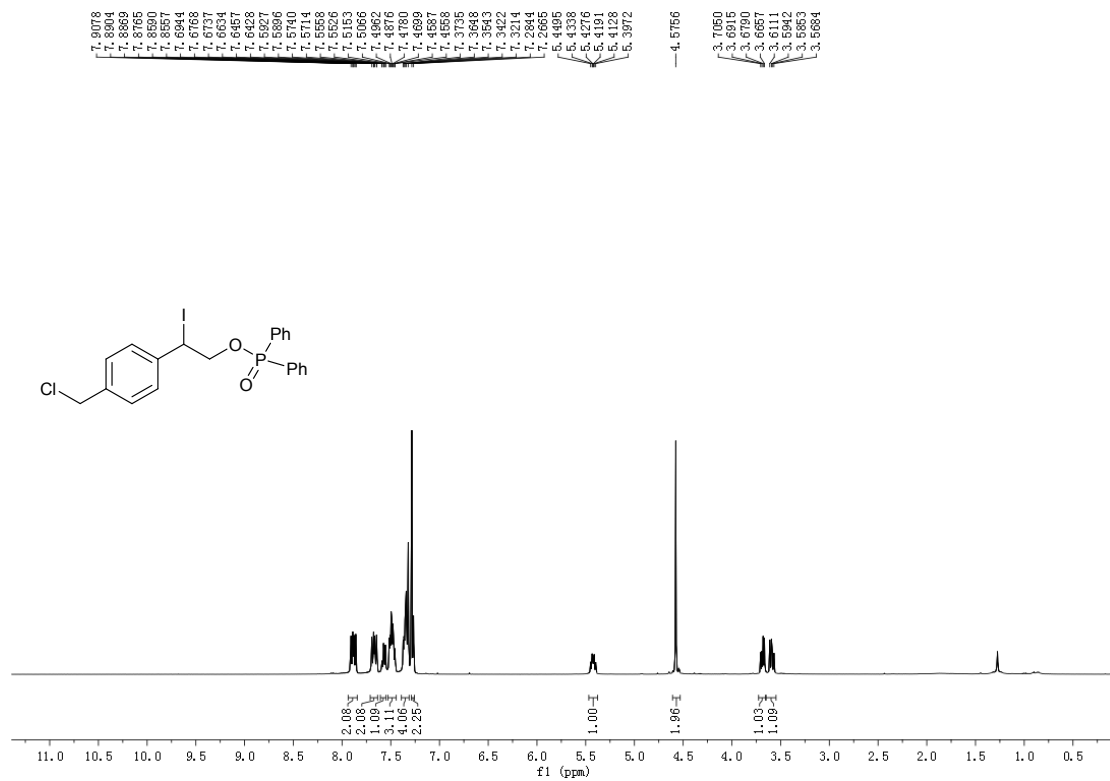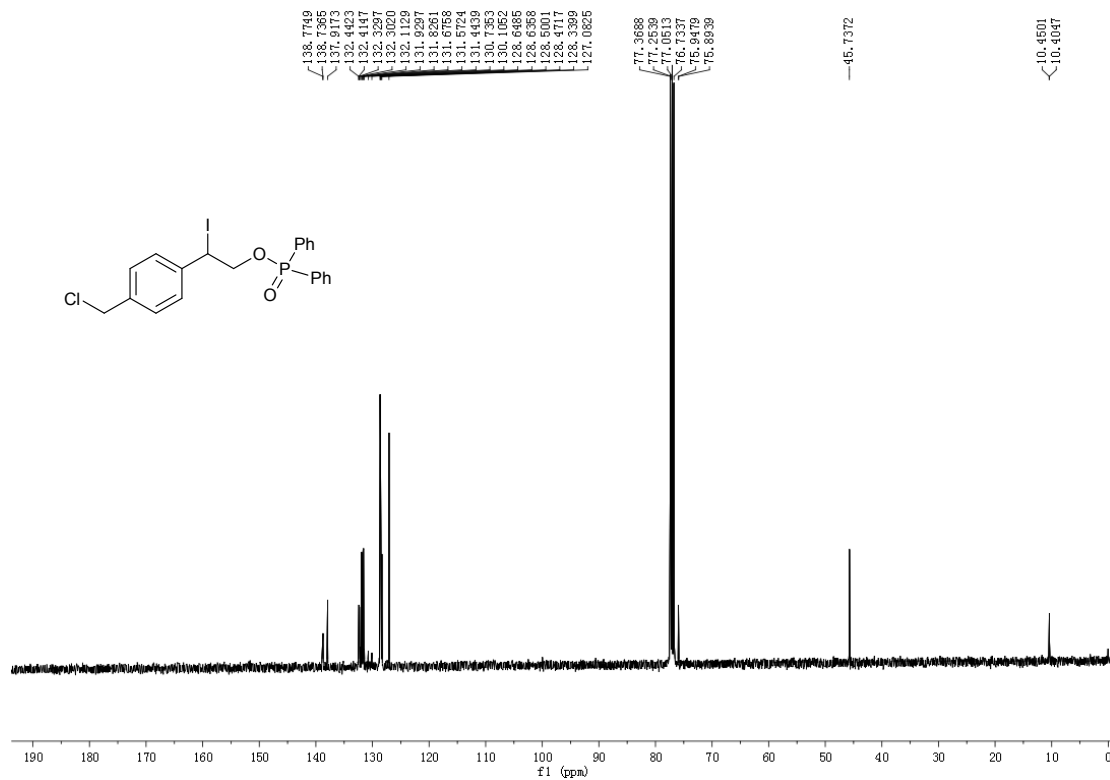

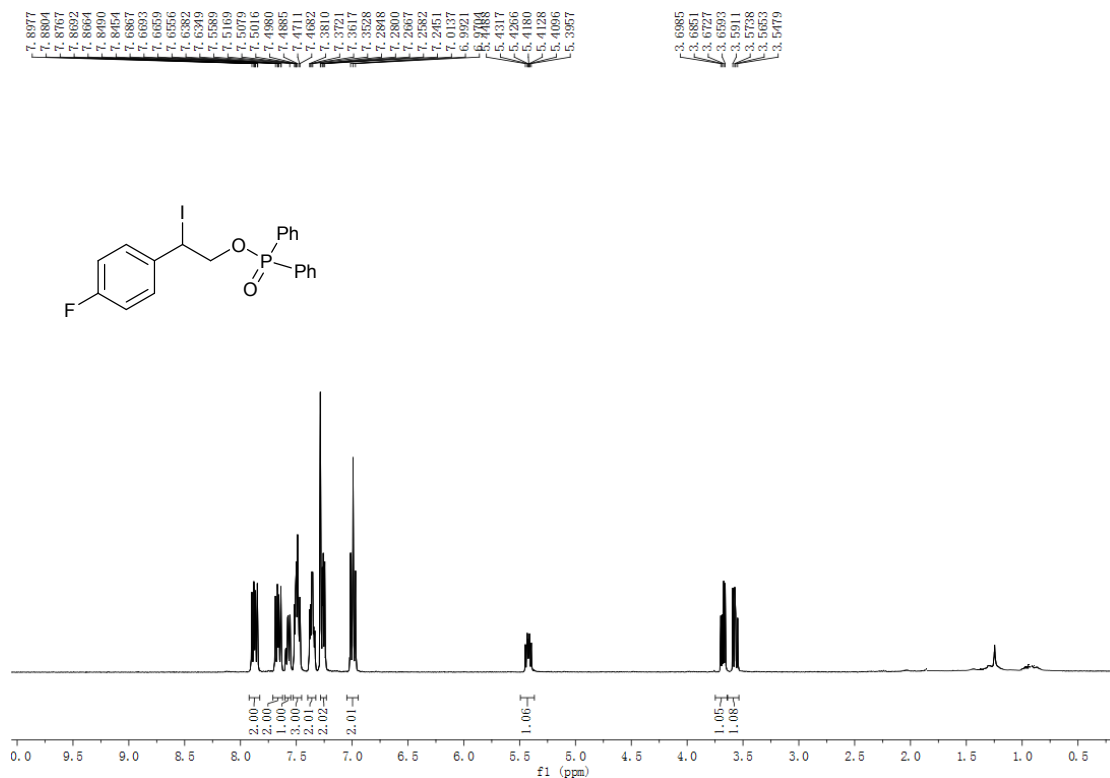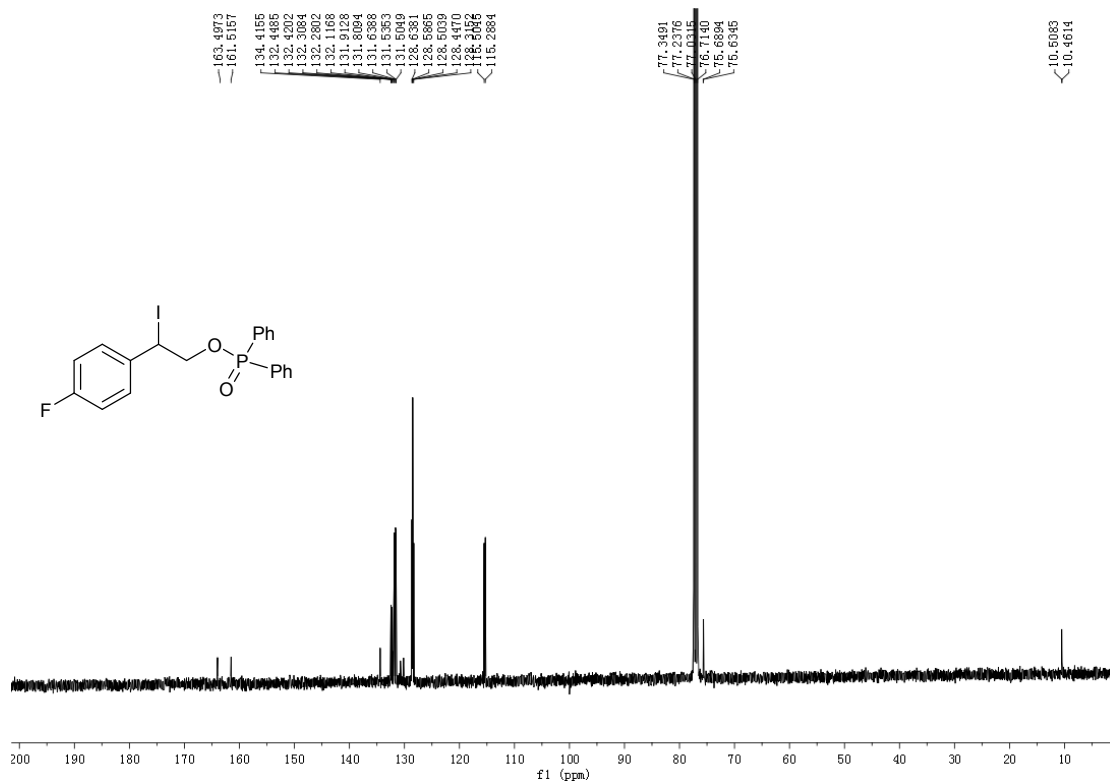



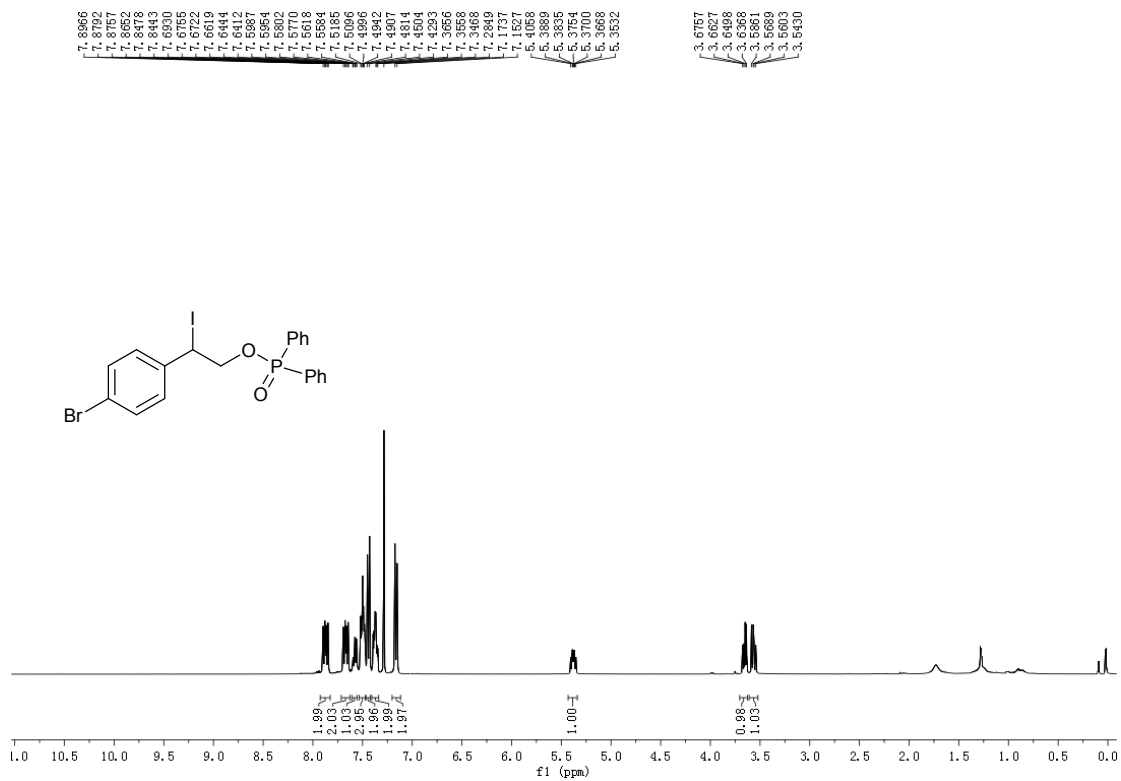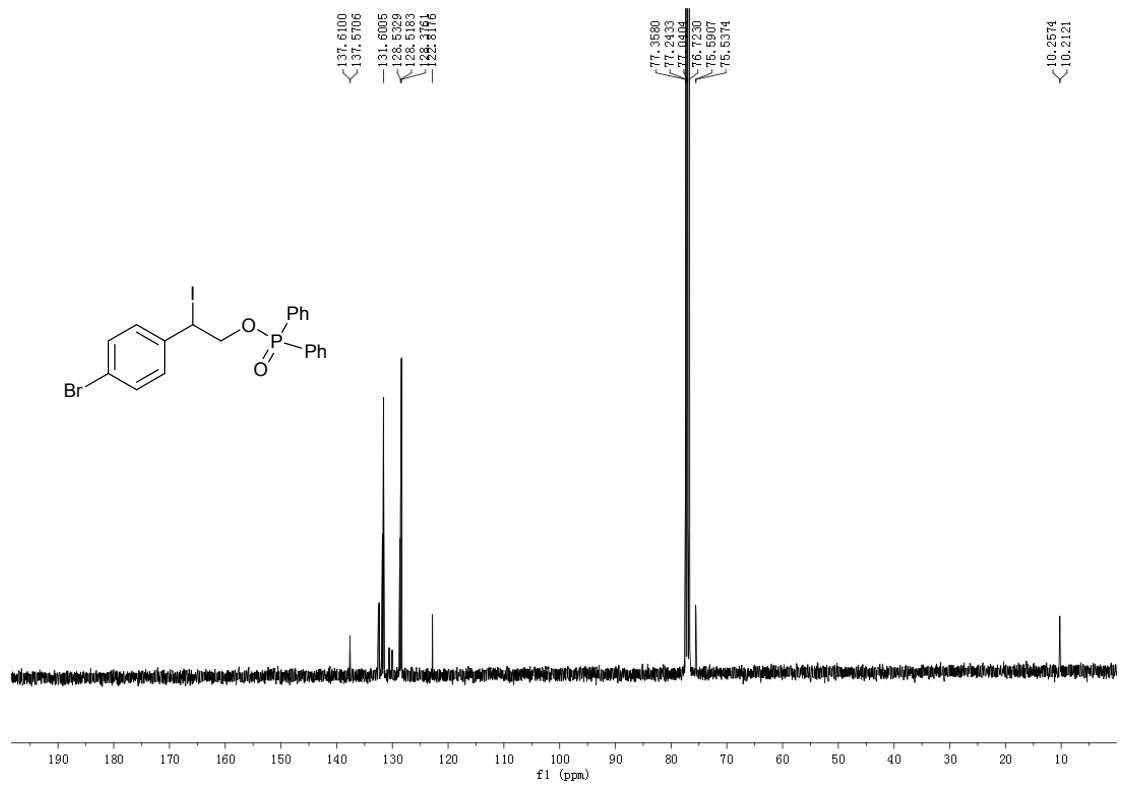

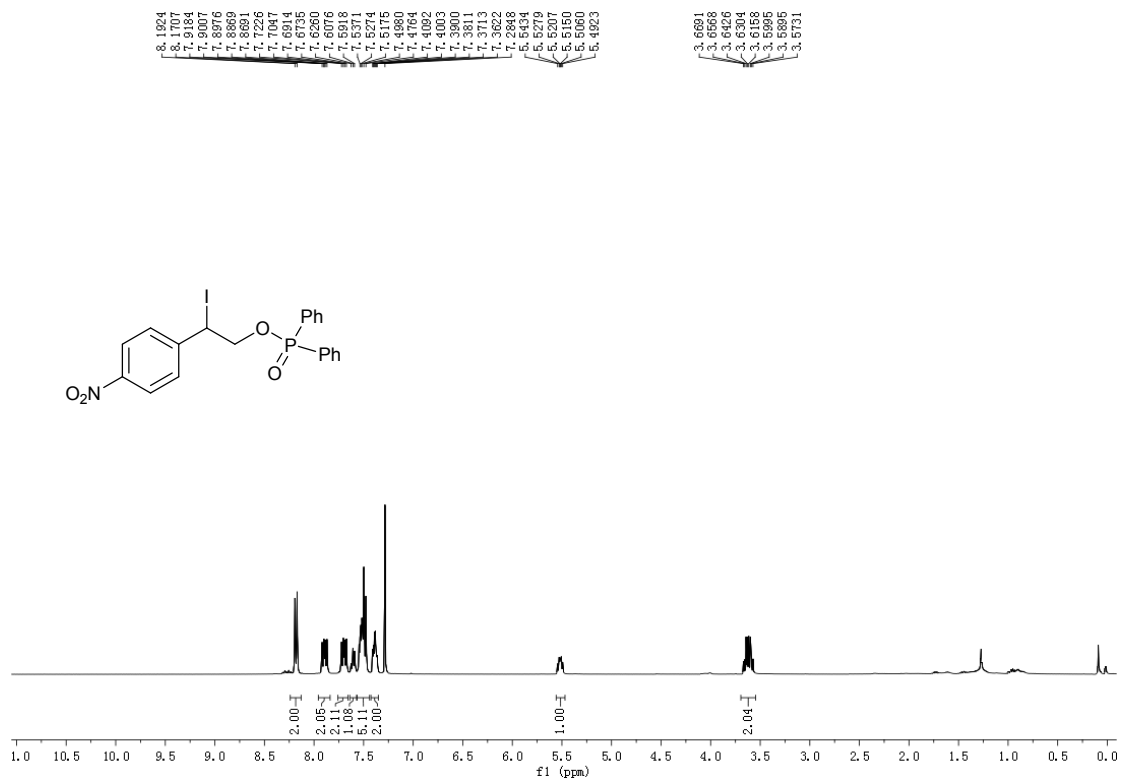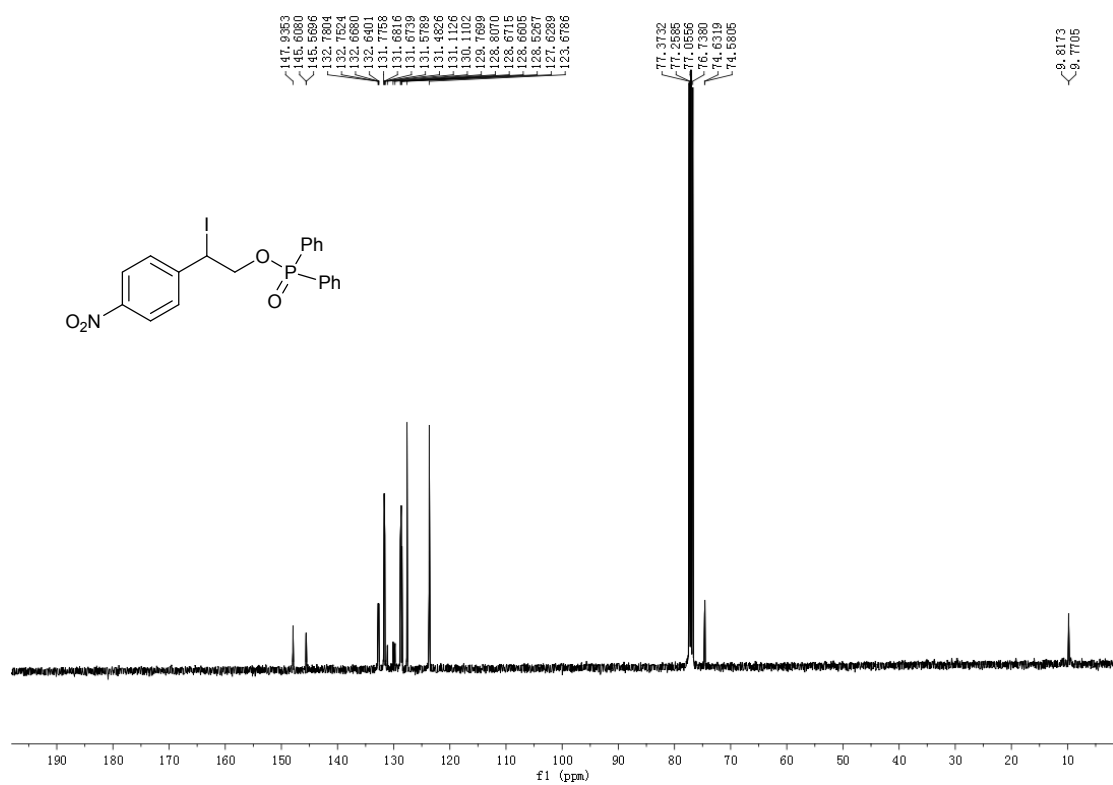

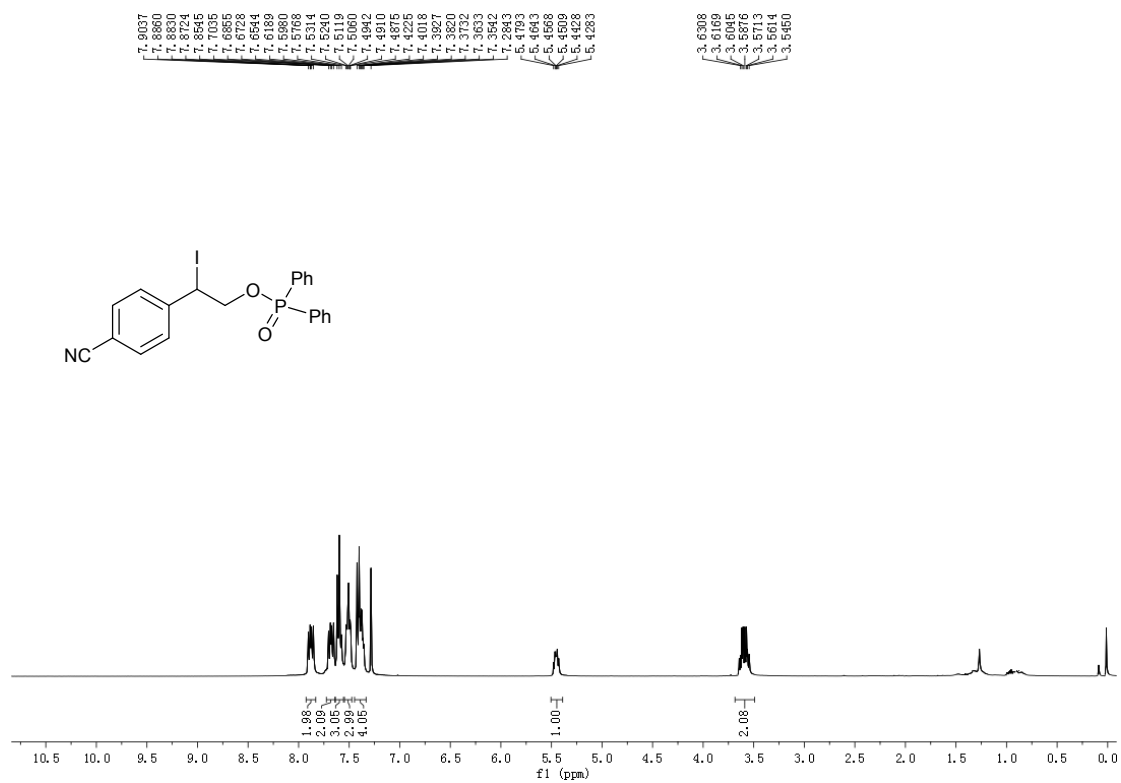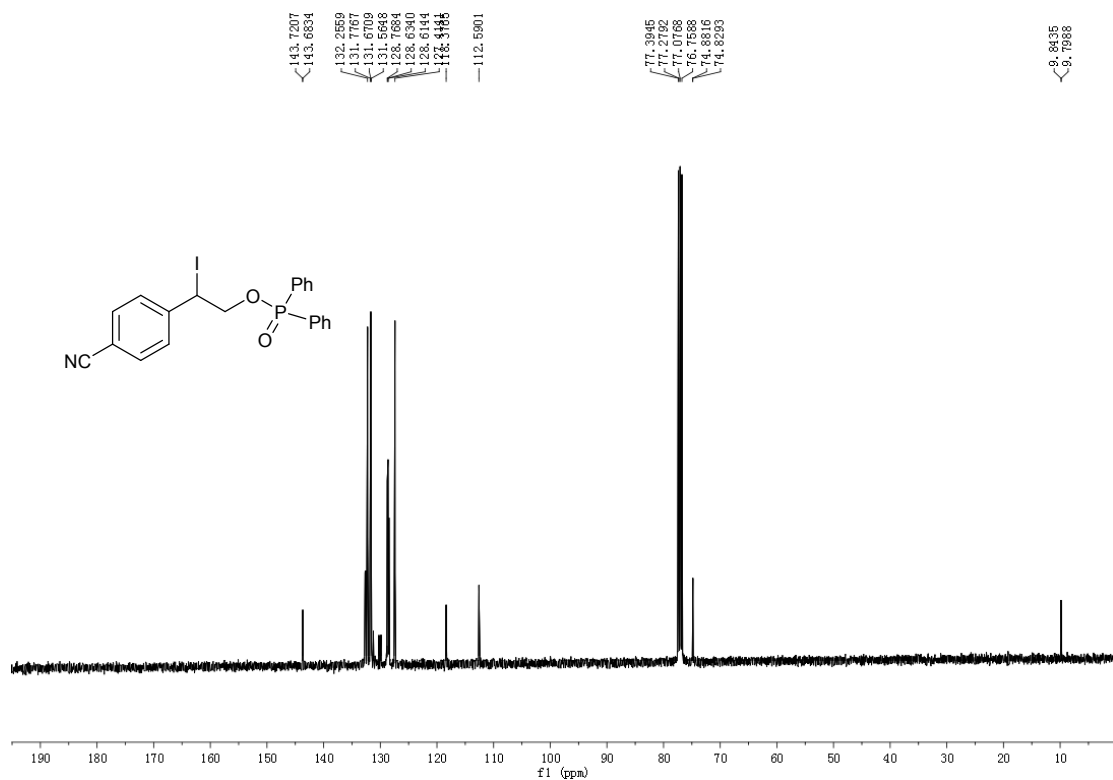

7.9413  
7.9340  
7.9204  
7.9100  
7.8926  
7.8881  
7.8499  
7.8390  
7.8322  
7.8166  
7.8006  
7.7873  
7.7771  
7.7062  
7.6854  
7.6576  
7.6545  
7.6149  
7.5719  
7.5551  
7.5527  
7.5205  
7.5179  
7.5150  
7.5077  
7.4999  
7.4981  
7.4891  
7.4850  
7.4650  
7.4378  
7.4337  
7.3868  
7.3851  
7.3641  
7.2841  
7.2762  
7.2674  
7.2546  
7.2516  
5.6258  
5.6210  
5.6115  
5.6066  
5.5897

3.8345  
3.8210  
3.8087  
3.7953  
3.7349  
3.7173  
3.7092  
3.6916

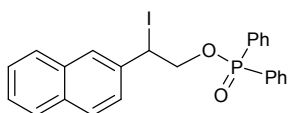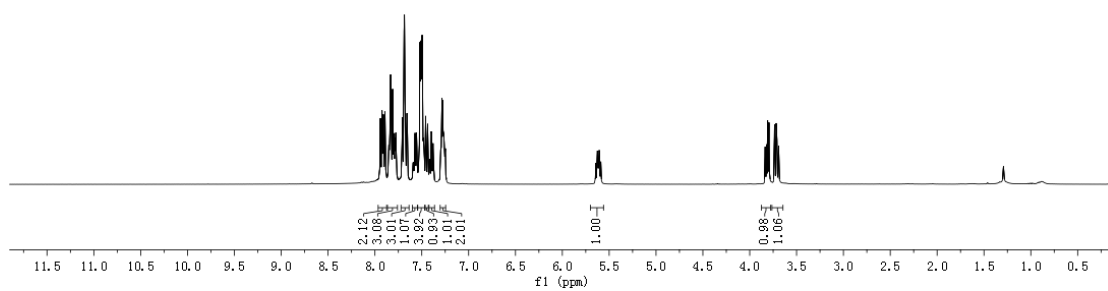

135.7491  
135.7094  
133.3919  
132.8145  
132.4119  
132.3842  
132.3194  
132.2262  
132.1877  
131.9829  
131.8792  
131.6901  
131.5868  
131.5281  
130.9245  
130.1940  
128.6661  
128.5064  
128.3813  
128.2421  
127.7222  
126.7526  
126.5199  
126.3767  
123.5984

77.4202  
77.1024  
76.7846

10.4637  
10.4265

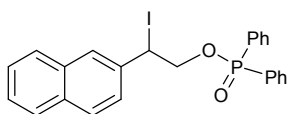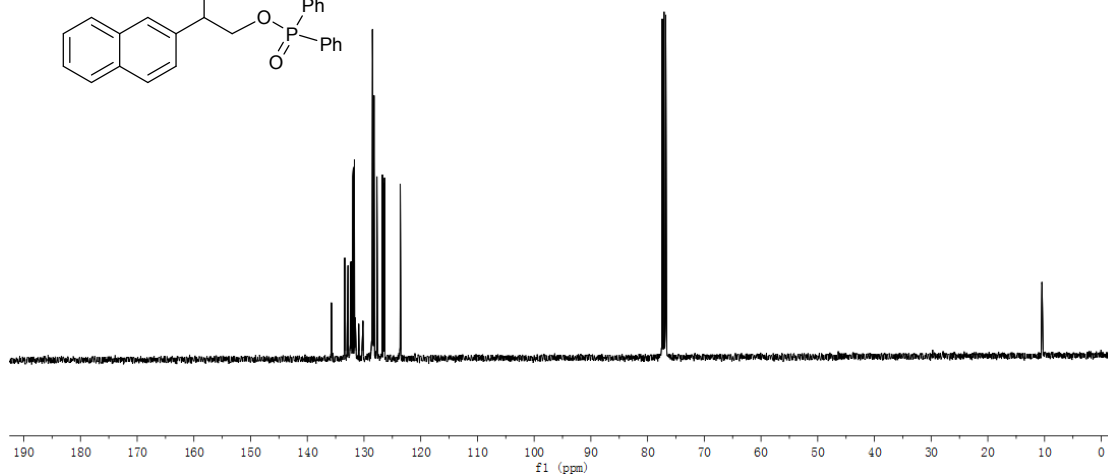

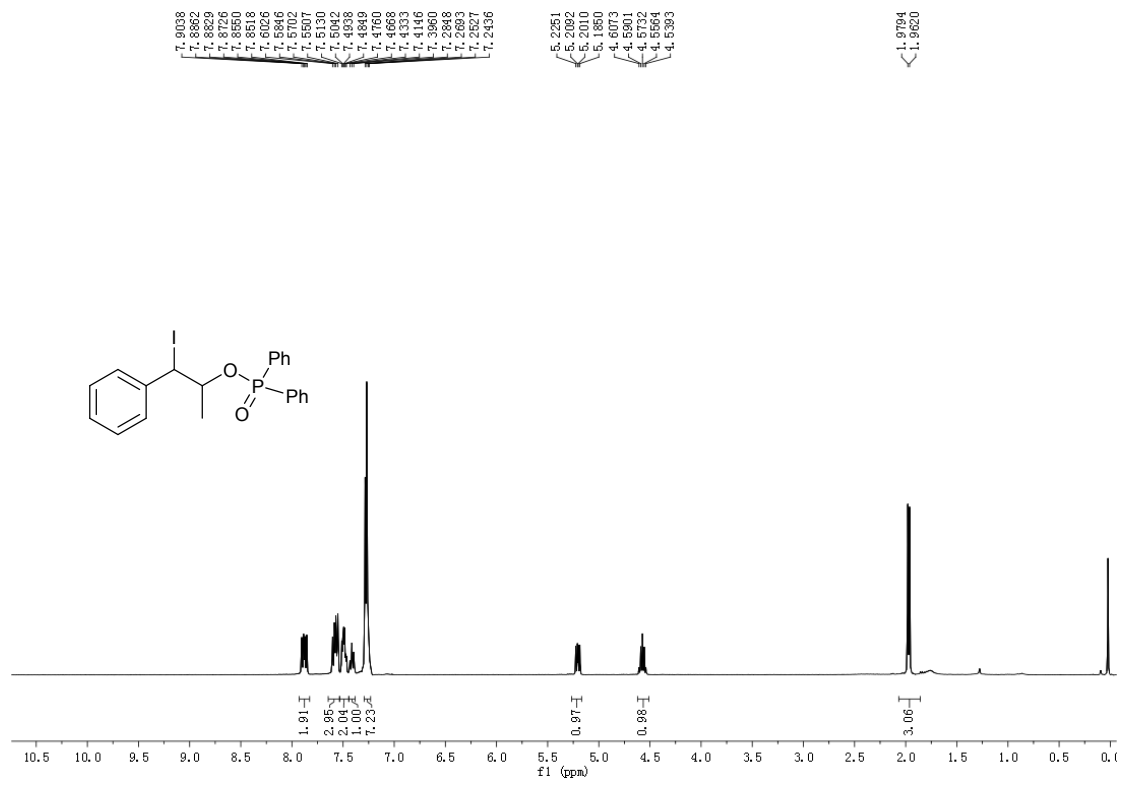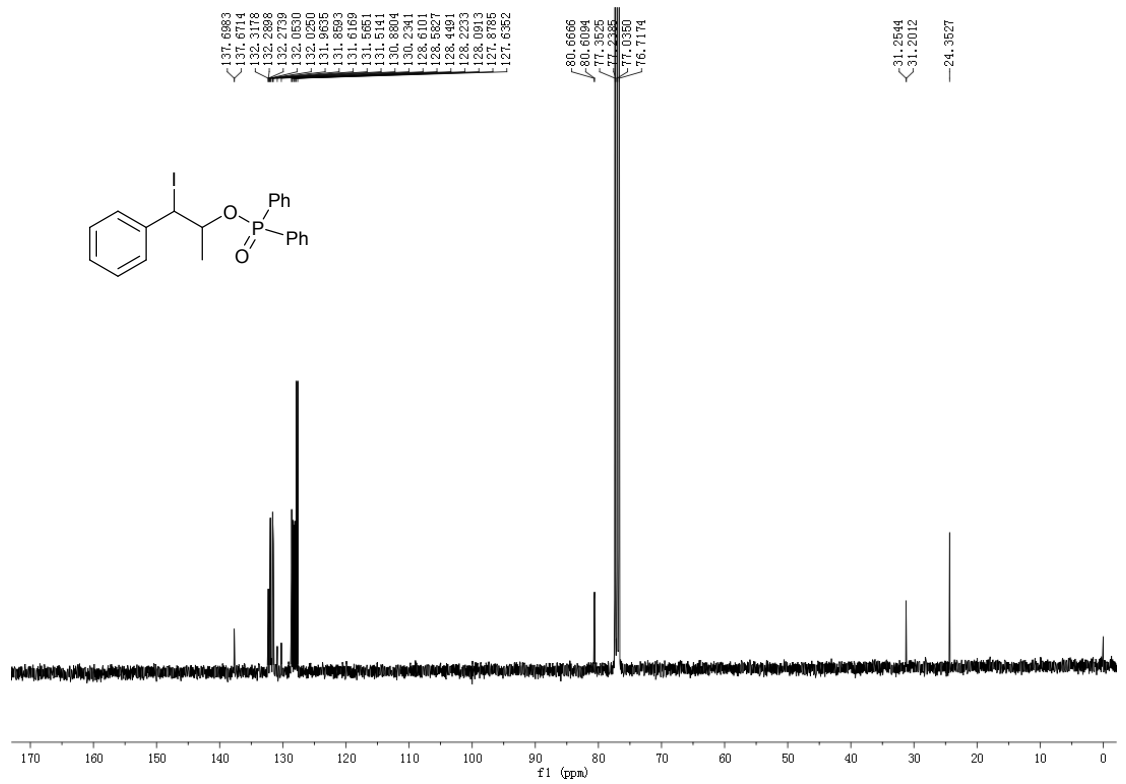

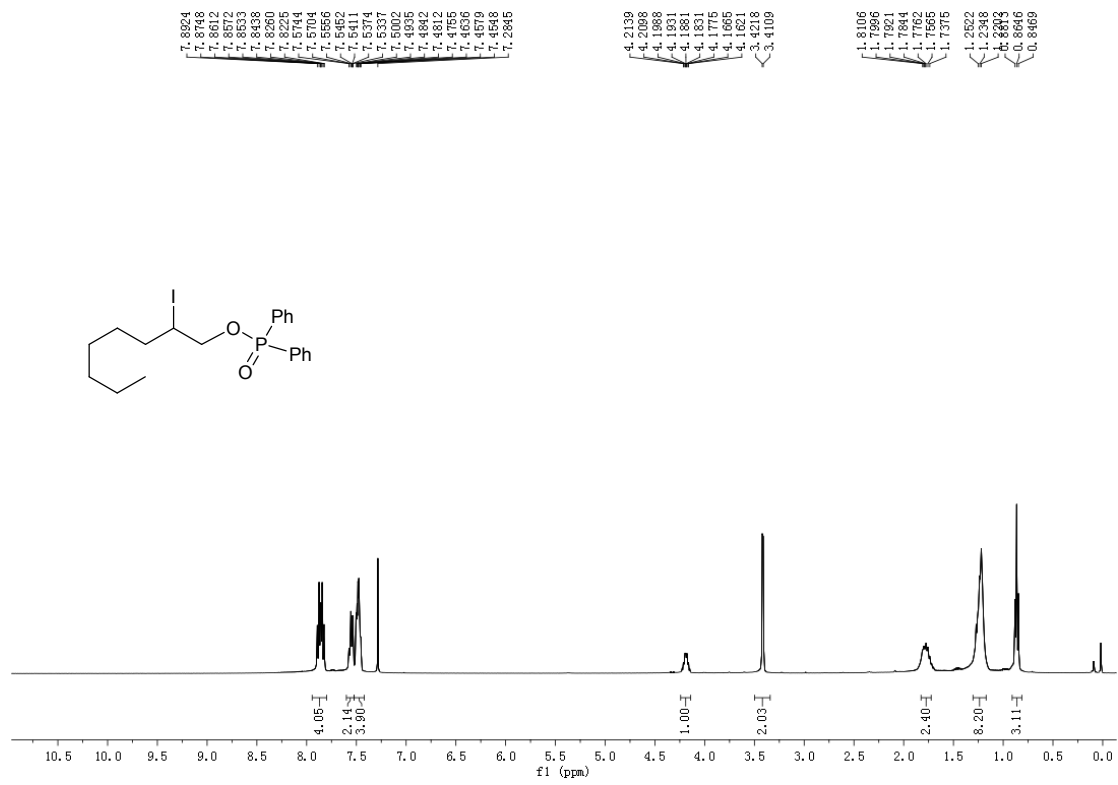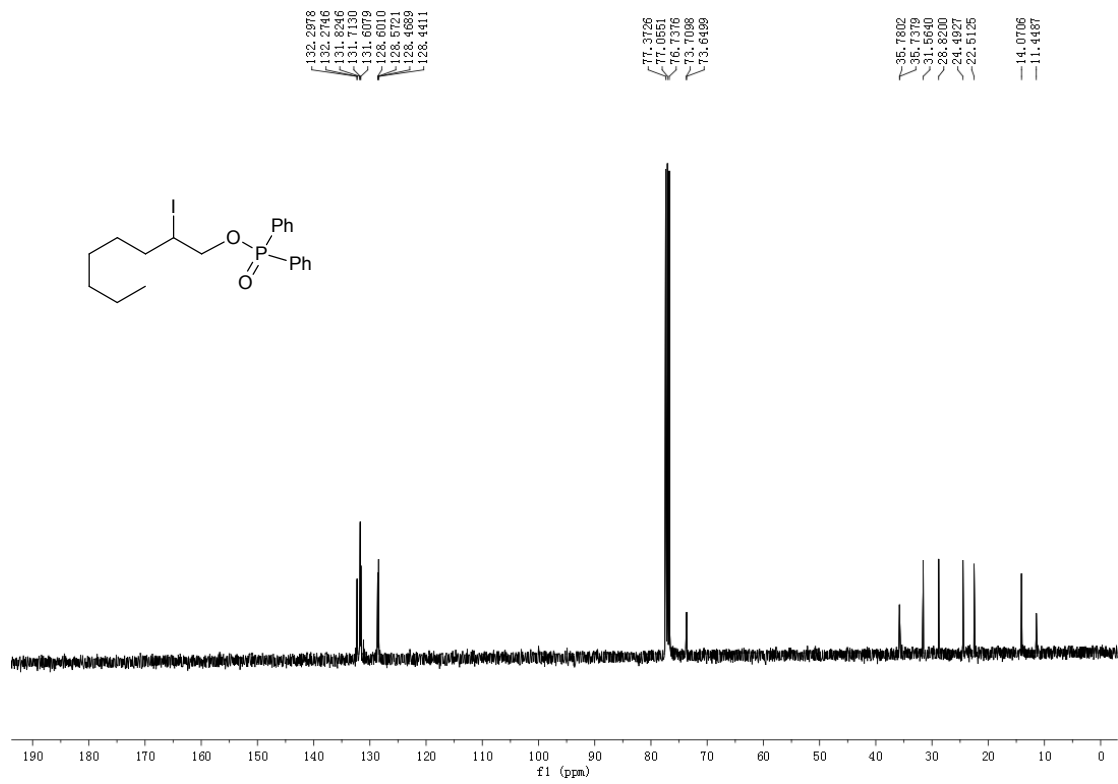

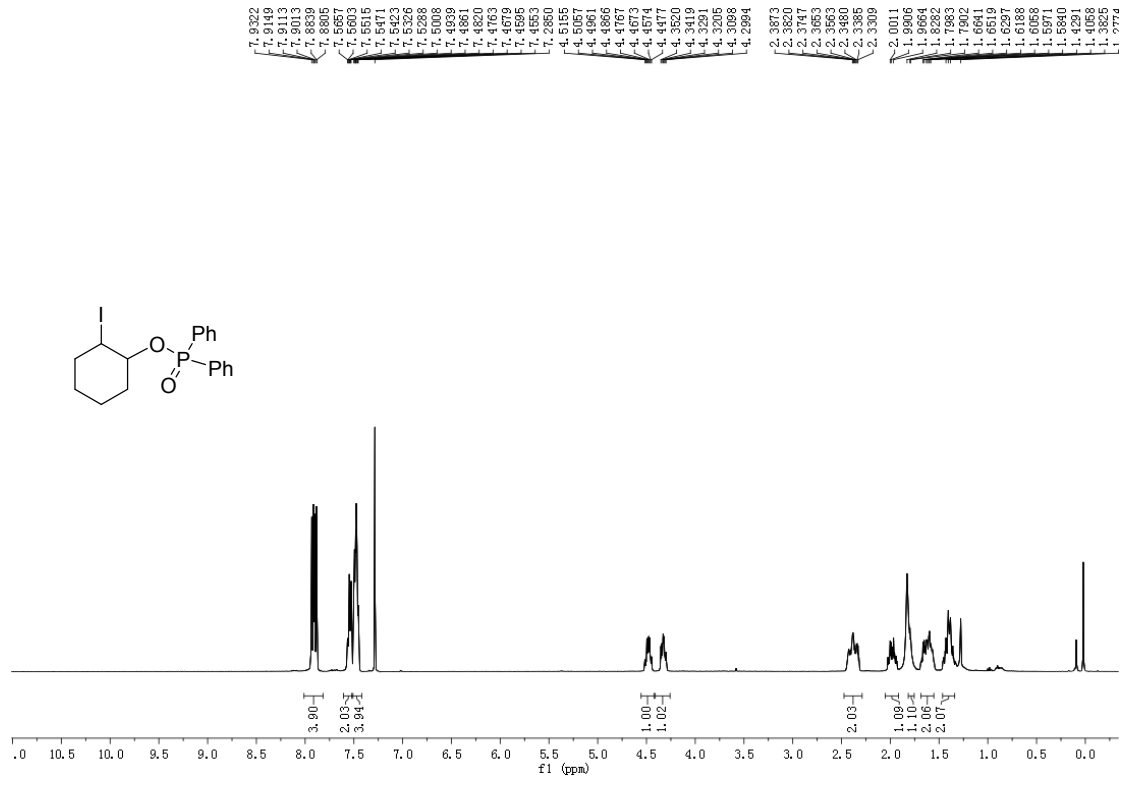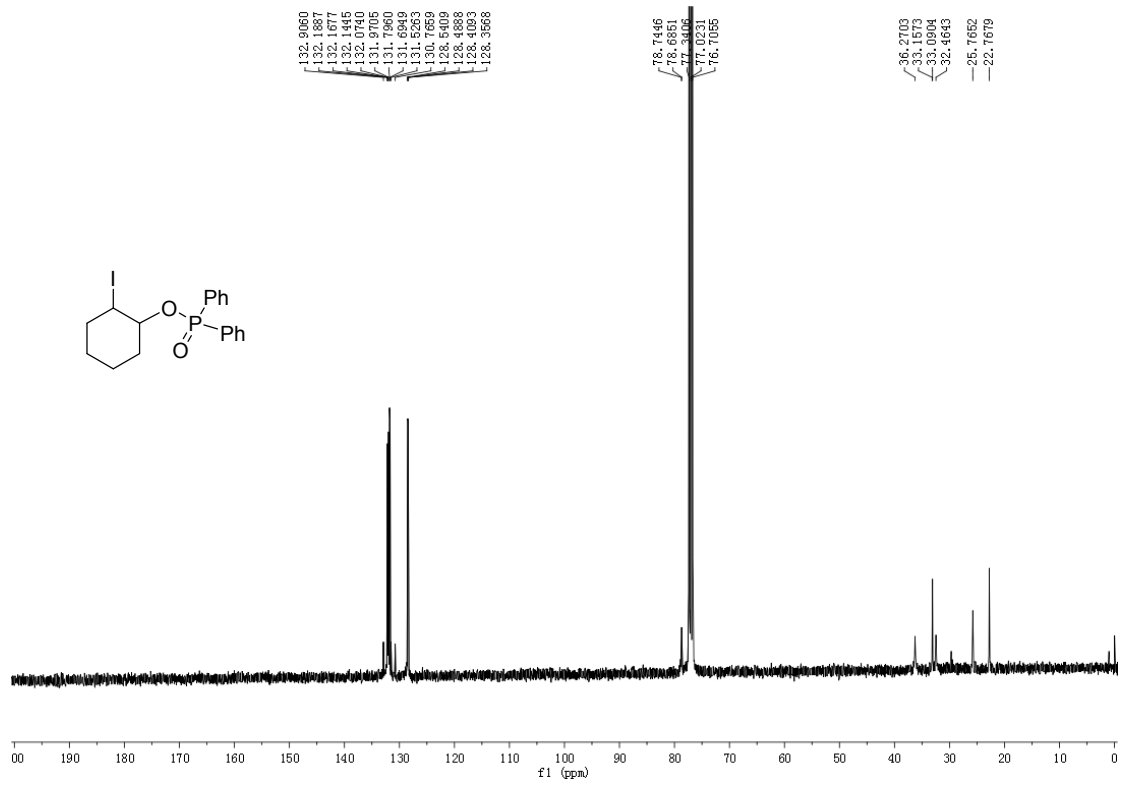

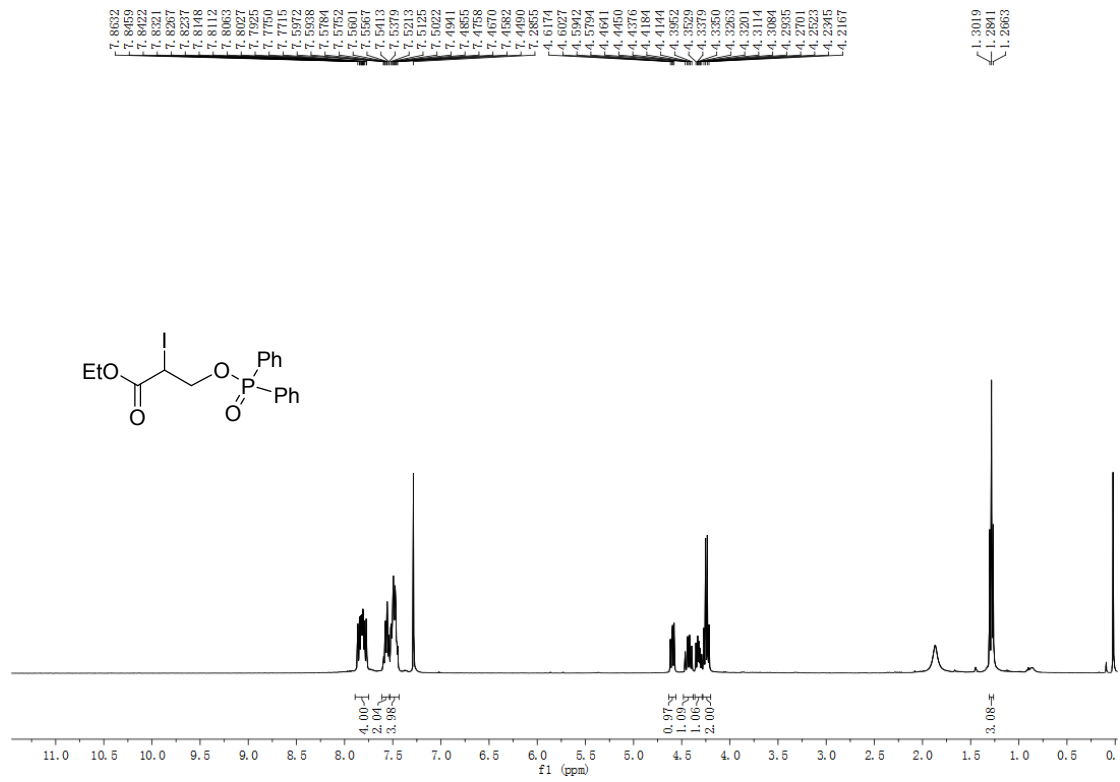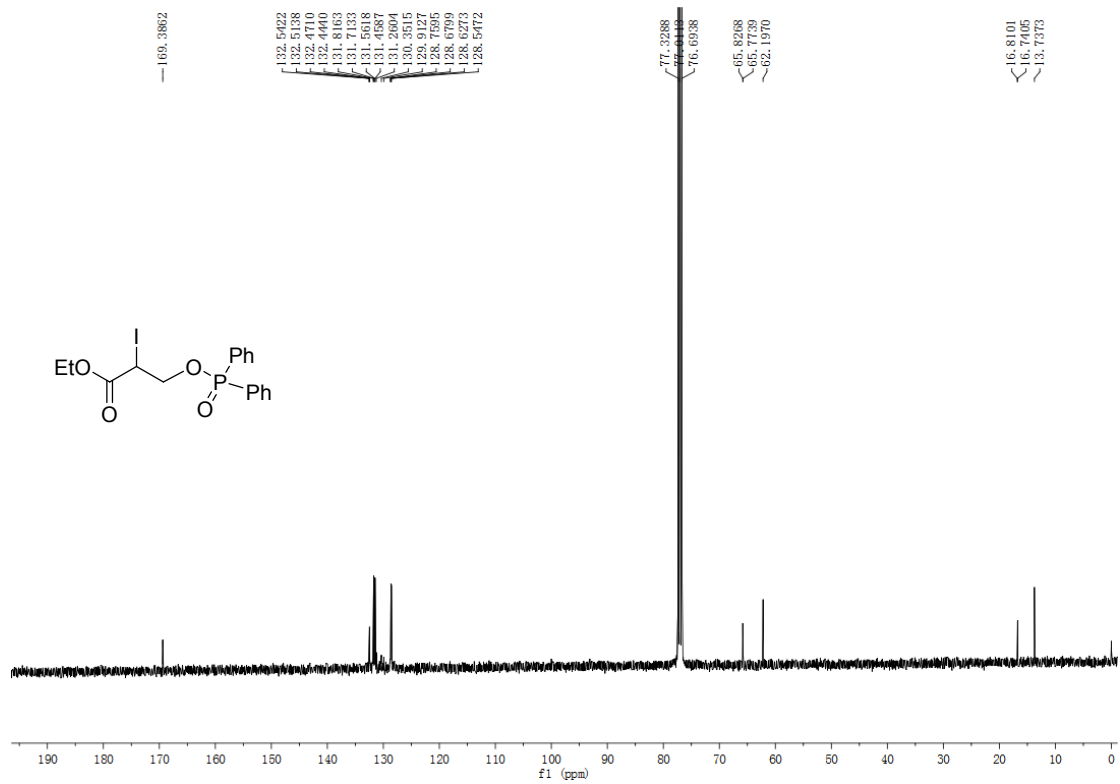



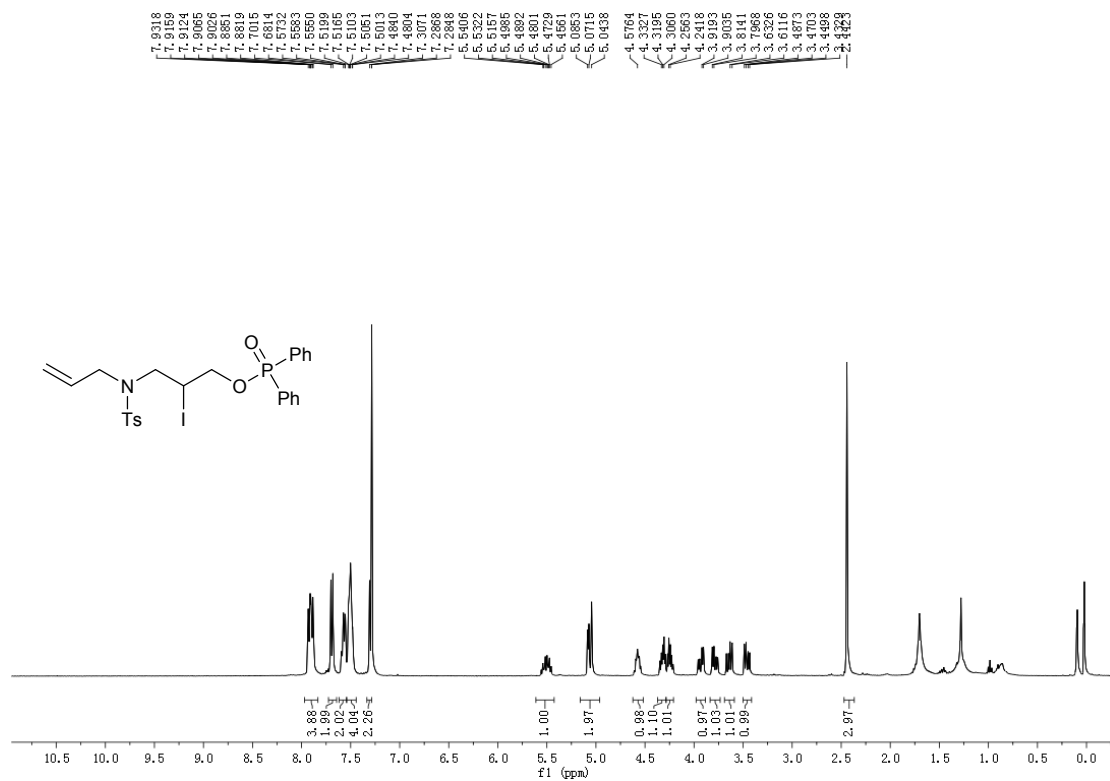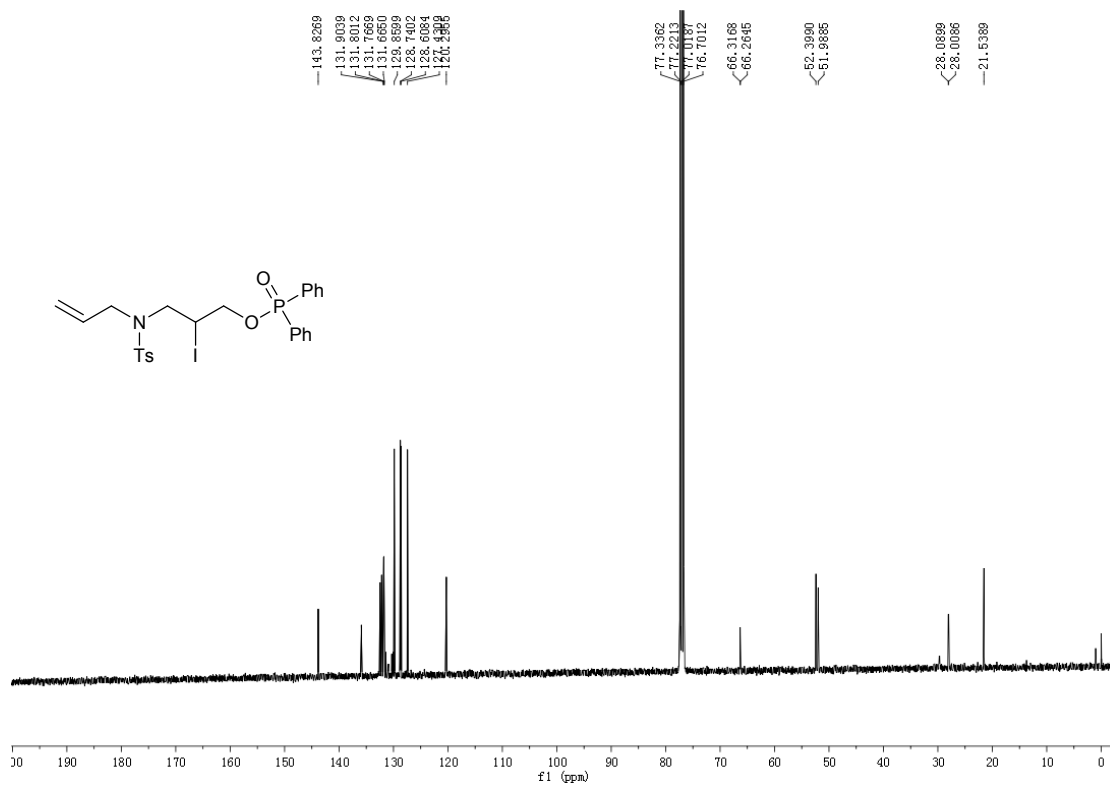

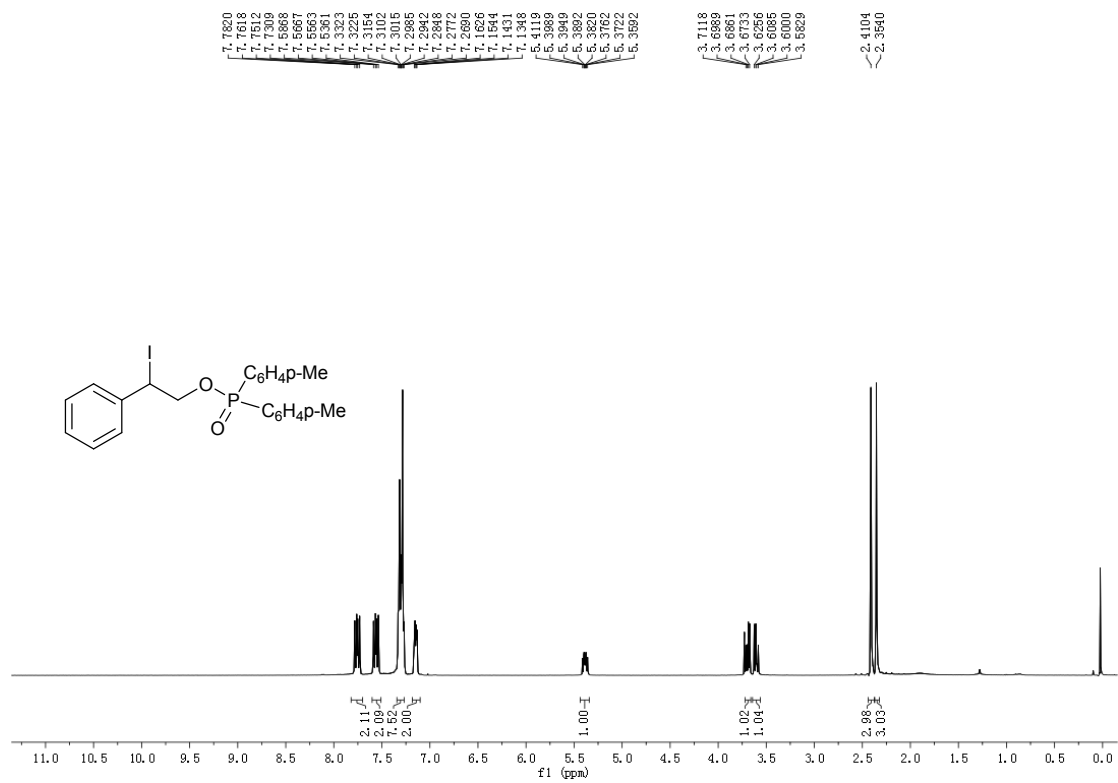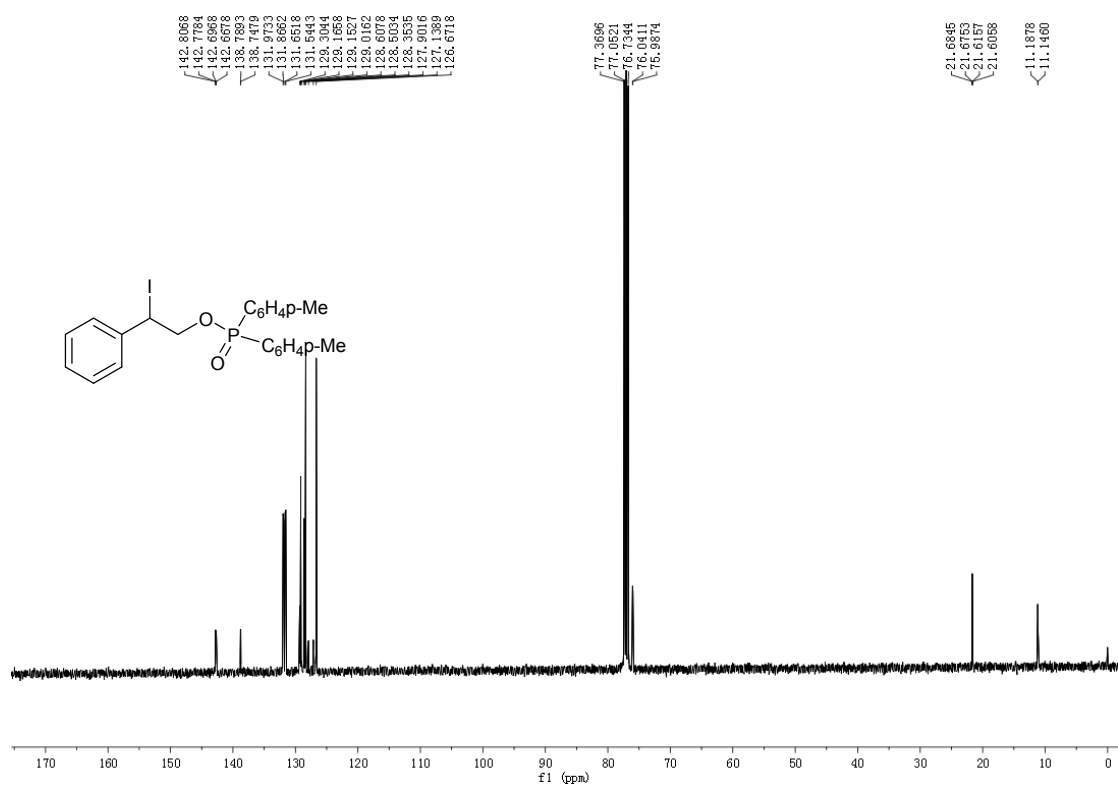

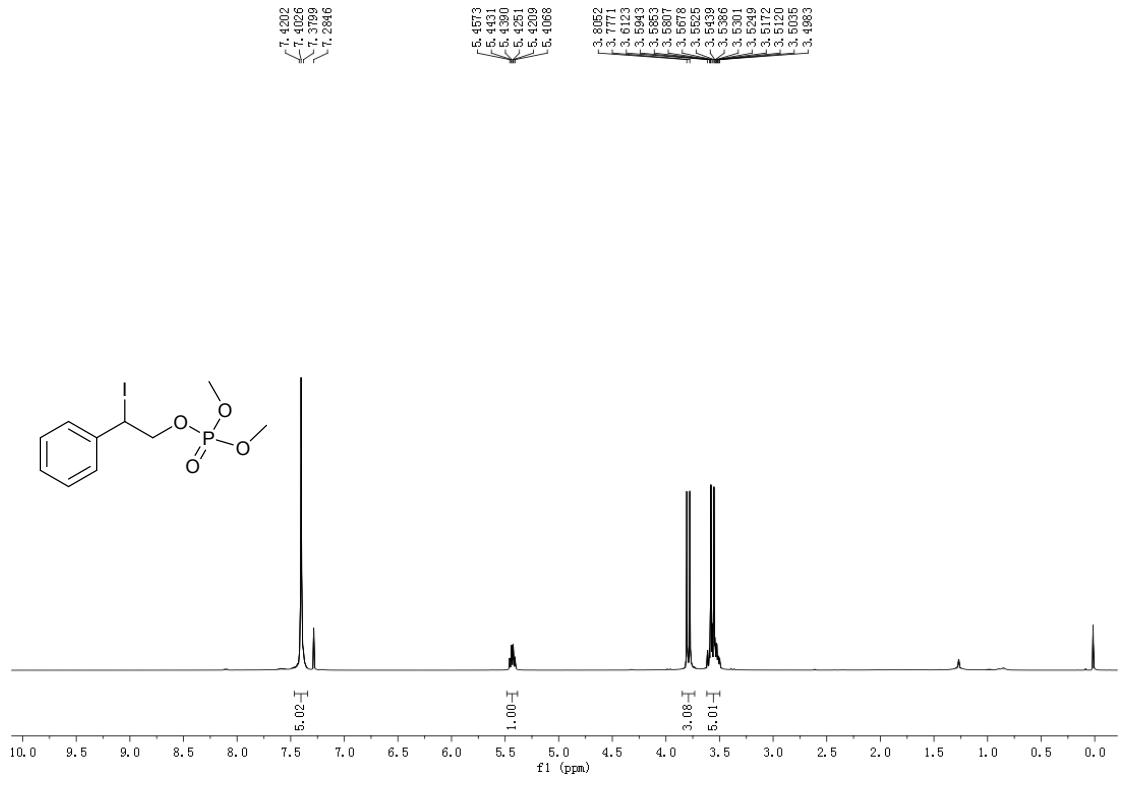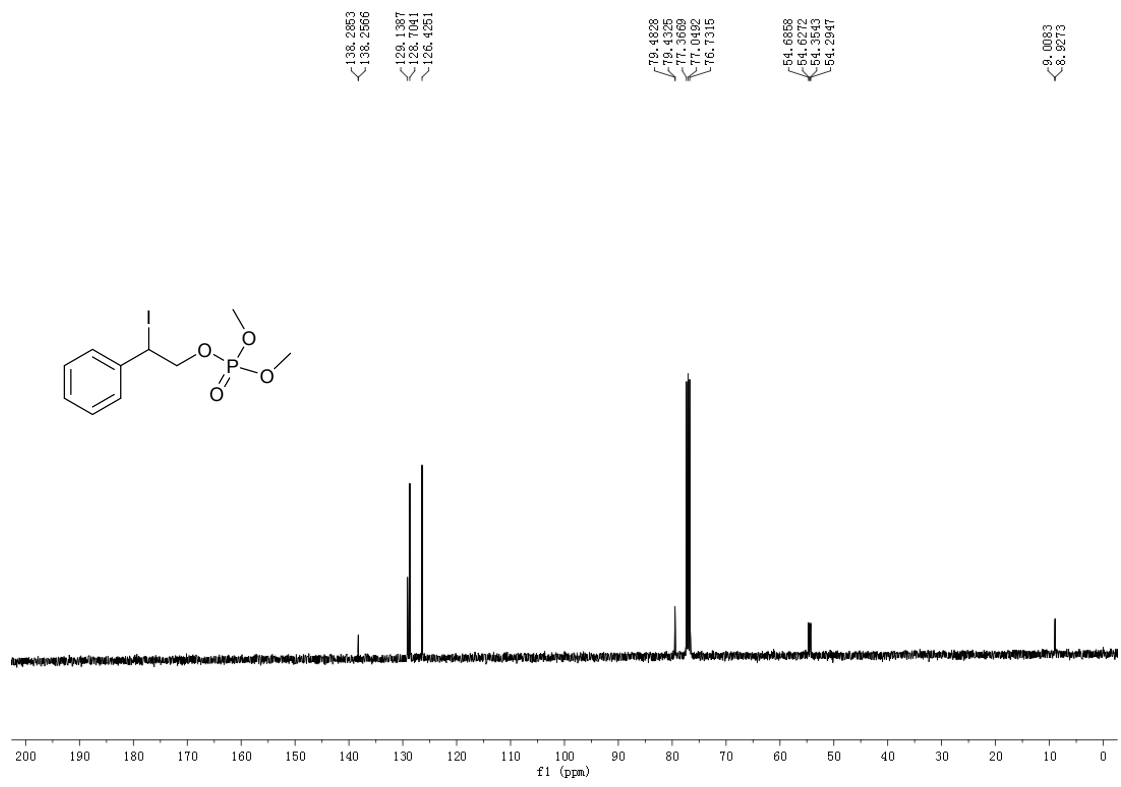

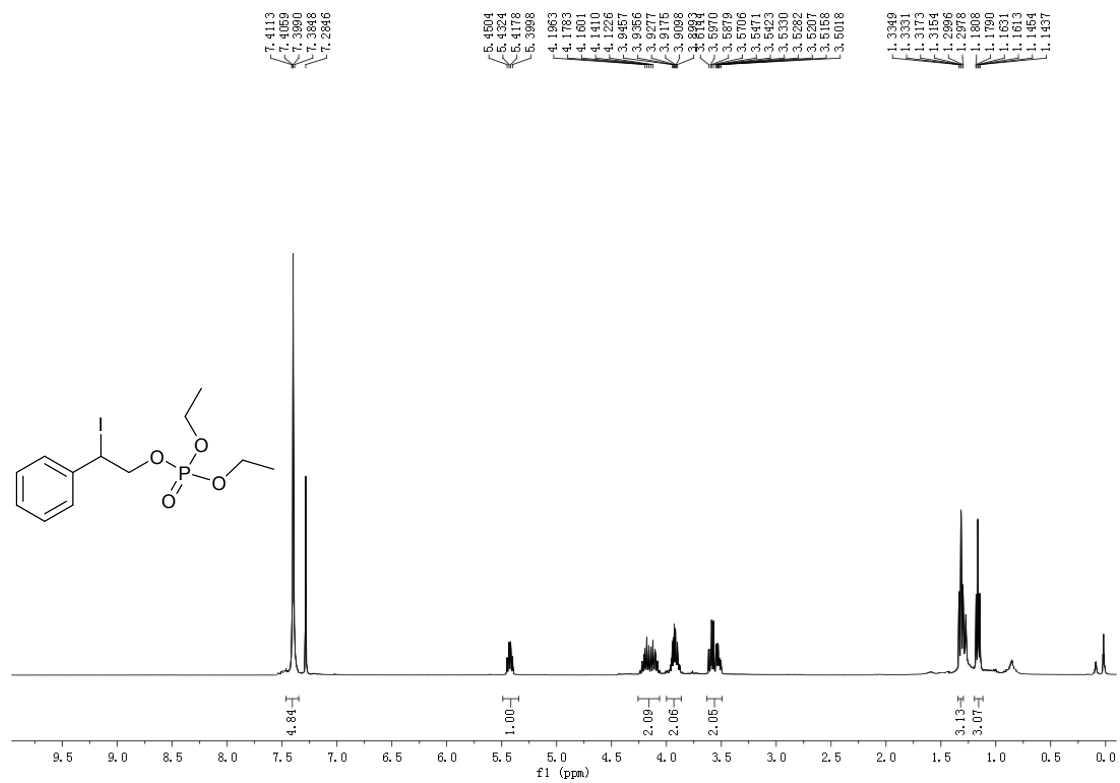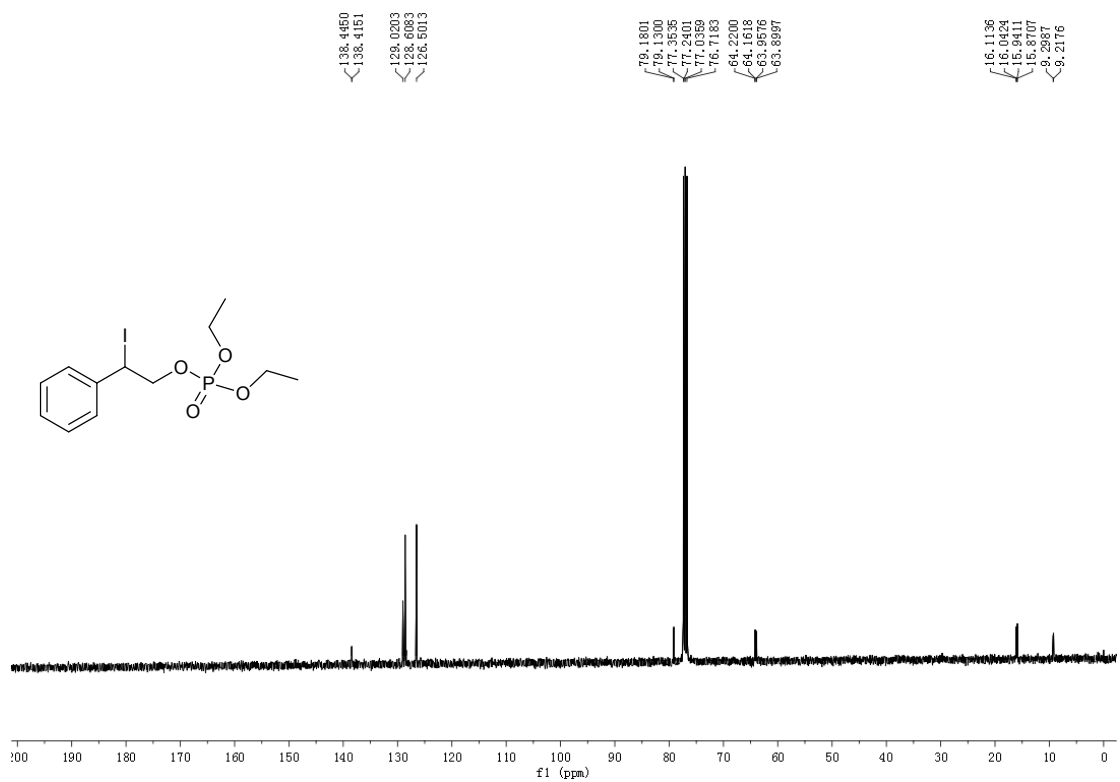

Supplement: c5qo00208g1.pdf [file c5qo00208g1.pdf]
